# Supplementary material for: The Chemically Highly Diversified Metabolites from the Red Sea Marine Sponge Spongia sp
Source: MDPI journal article supplement (doi:10.3390/md20040241), 2022-03-30
Supplement: s1 [file s1]

# The Chemically Highly Diversified Metabolites from a Red Sea Marine Sponge *Spongia* sp.

Chi-Jen Tai,<sup>1,†</sup> Atallah F. Ahmed,<sup>2,3,†</sup> Chih-Hua Chao,<sup>4,5</sup> Chia-Hung Yen,<sup>6</sup> Tsong-Long Hwang,<sup>7,8,9</sup> Fang-Rong Chang,<sup>6</sup> Yusheng M. Huang<sup>10,11</sup> and Jyh-Horng Sheu<sup>1,6,12,13,\*</sup>

- <sup>1</sup> Doctoral Degree Program in Marine Biotechnology, National Sun Yat-sen University, Kaohsiung 80424, Taiwan; chijentai@g-mail.nsysu.edu.tw (C.-J.T.).
- <sup>2</sup> Department of Pharmacognosy, College of Pharmacy, King Saud University, Riyadh 11451, Saudi Arabia; afahmed@ksu.edu.sa (A.F.A.).
- <sup>3</sup> Department of Pharmacognosy, Faculty of Pharmacy, Mansoura University, Mansoura 35516, Egypt
- <sup>4</sup> School of Pharmacy, China Medical University, Taichung 40604, Taiwan; chchao@mail.cmu.edu.tw (C.-H.C.)
- <sup>5</sup> Chinese Medicine Research and Development Center, China Medical University Hospital, Taichung 40604, Taiwan
- <sup>6</sup> Graduate Institute of Natural Products, College of Pharmacy, Kaohsiung Medical University, Kaohsiung 80708, Taiwan; chyen@kmu.edu.tw; (C.-H.Y.), aaronfrc@kmu.edu.tw (F.-R.C.)
- <sup>7</sup> Graduate Institute of Natural Products, College of Medicine, Chang Gung University, Taoyuan 333, Taiwan; htl@mail.cgu.edu.tw (T.-L.H.)
- <sup>8</sup> Research Center for Chinese Herbal Medicine, Graduate Institute of Healthy Industry Technology, College of Human Ecology, Chang Gung University of Science and Technology, Taoyuan 333, Taiwan
- <sup>9</sup> Department of Anesthesiology, Chang Gung Memorial Hospital, Taoyuan 333, Taiwan
- <sup>10</sup> Department of Marine Recreation, National Penghu University of Science and Technology, Magong, Penghu 88046, Taiwan; yusheng@gms.npu.edu.tw (Y.M.H.).
- <sup>11</sup> Tropical Island Sustainable Development Research Center, National Penghu University of Science and Technology, Magong, Penghu 88046, Taiwan.
- <sup>12</sup> Department of Marine Biotechnology and Resources, National Sun Yat-sen University, Kaohsiung 80424, Taiwan
- <sup>13</sup> Department of Medical Research, China Medical University Hospital, China Medical University, Taichung 404333, Taiwan.
- \* Correspondence: sheu@mail.nsysu.edu.tw (J.-H.S.); Tel.: +886-7-525-2000 (ext. 5030); Fax: +886-7-525-5020.
- † These authors contributed equally to this work.

# Contents

|                                                                                                                                                                                           |    |
|-------------------------------------------------------------------------------------------------------------------------------------------------------------------------------------------|----|
| <b>Table S1.</b> Selected $^1\text{H}$ and $^{13}\text{C}$ NMR data of <b>2</b> and similar compounds <b>13</b> and <b>14</b> in $\text{CDCl}_3$ and $\text{C}_5\text{D}_5\text{N}$ ..... | 3  |
| <b>Table S2.</b> Selected $^{13}\text{C}$ NMR data at C20-C29 of <b>2</b> and related compounds <b>15–18</b> .....                                                                        | 3  |
| <b>Table S3.</b> $^{13}\text{C}$ and $^1\text{H}$ NMR data of <b>3</b> and related compound <b>19</b> .....                                                                               | 4  |
| <b>Table S4.</b> Cytotoxicities of compounds <b>1–9</b> .....                                                                                                                             | 5  |
| <b>Table S5.</b> The cartesian coordinates of conformer of compound <b>1</b> at the B3LYP/6-311+G(d,p) level of theory.....                                                               | 11 |
| <b>Table S6.</b> The cartesian coordinates of conformer of compound <b>2</b> at the CAM-B3LYP/6-311+G(d,p) level of theory.....                                                           | 16 |
| <b>Figure S1.</b> HRESIMS spectrum of <b>1</b> .....                                                                                                                                      | 6  |
| <b>Figure S2.</b> $^1\text{H}$ NMR spectrum of <b>1</b> .....                                                                                                                             | 6  |
| <b>Figure S3.</b> $^{13}\text{C}$ NMR spectrum of <b>1</b> .....                                                                                                                          | 7  |
| <b>Figure S4.</b> DEPT spectrum of <b>1</b> .....                                                                                                                                         | 7  |
| <b>Figure S5.</b> HSQC spectrum of <b>1</b> .....                                                                                                                                         | 8  |
| <b>Figure S6.</b> $^1\text{H}$ – $^1\text{H}$ COSY spectrum of <b>1</b> .....                                                                                                             | 8  |
| <b>Figure S7.</b> HMBC spectrum of <b>1</b> .....                                                                                                                                         | 9  |
| <b>Figure S8.</b> The partial HMBC spectrum of <b>1</b> .....                                                                                                                             | 9  |
| <b>Figure S9.</b> NOESY spectrum of <b>1</b> .....                                                                                                                                        | 10 |
| <b>Figure S10.</b> HRESIMS spectrum of <b>2</b> .....                                                                                                                                     | 12 |
| <b>Figure S11.</b> $^1\text{H}$ NMR spectrum of <b>2</b> .....                                                                                                                            | 12 |
| <b>Figure S12.</b> $^{13}\text{C}$ NMR spectrum of <b>2</b> .....                                                                                                                         | 13 |
| <b>Figure S13.</b> HSQC spectrum of <b>2</b> .....                                                                                                                                        | 13 |
| <b>Figure S14.</b> $^1\text{H}$ – $^1\text{H}$ COSY spectrum of <b>2</b> .....                                                                                                            | 14 |
| <b>Figure S15.</b> HMBC spectrum of <b>2</b> .....                                                                                                                                        | 14 |
| <b>Figure S16.</b> NOESY spectrum of <b>2</b> .....                                                                                                                                       | 15 |
| <b>Figure S17.</b> HRESIMS spectrum of <b>3</b> .....                                                                                                                                     | 18 |
| <b>Figure S18.</b> $^1\text{H}$ NMR spectrum of <b>3</b> .....                                                                                                                            | 18 |
| <b>Figure S19.</b> $^{13}\text{C}$ NMR spectrum of <b>3</b> .....                                                                                                                         | 19 |
| <b>Figure S20.</b> $^1\text{H}$ – $^1\text{H}$ COSY spectrum of <b>3</b> .....                                                                                                            | 19 |
| <b>Figure S21.</b> HMBC spectrum of <b>3</b> .....                                                                                                                                        | 20 |
| <b>Figure S22.</b> NOESY spectrum of <b>3</b> .....                                                                                                                                       | 20 |
| <b>Figure S23.</b> HRESIMS spectrum of <b>4</b> .....                                                                                                                                     | 21 |
| <b>Figure S24.</b> $^1\text{H}$ NMR spectrum of <b>4</b> .....                                                                                                                            | 21 |
| <b>Figure S25.</b> $^{13}\text{C}$ NMR spectrum of <b>4</b> .....                                                                                                                         | 22 |
| <b>Figure S26.</b> DEPT spectrum of <b>4</b> .....                                                                                                                                        | 22 |
| <b>Figure S27.</b> HSQC spectrum of <b>4</b> .....                                                                                                                                        | 23 |
| <b>Figure S28.</b> $^1\text{H}$ – $^1\text{H}$ COSY spectrum of <b>4</b> .....                                                                                                            | 23 |
| <b>Figure S29.</b> HMBC spectrum of <b>4</b> .....                                                                                                                                        | 24 |
| <b>Figure S30.</b> NOESY spectrum of <b>4</b> .....                                                                                                                                       | 24 |
| <b>Figure S31.</b> HRESIMS spectrum of <b>5</b> .....                                                                                                                                     | 25 |
| <b>Figure S32.</b> $^1\text{H}$ NMR spectrum of <b>5</b> .....                                                                                                                            | 25 |
| <b>Figure S33.</b> $^{13}\text{C}$ NMR spectrum of <b>5</b> .....                                                                                                                         | 26 |
| <b>Figure S34.</b> ESIMS spectrum of <b>6</b> .....                                                                                                                                       | 26 |
| <b>Figure S35.</b> $^1\text{H}$ NMR spectrum of <b>6</b> .....                                                                                                                            | 27 |
| <b>Figure S36.</b> $^{13}\text{C}$ NMR spectrum of <b>6</b> .....                                                                                                                         | 27 |

|                                                                     |    |
|---------------------------------------------------------------------|----|
| <b>Figure S37.</b> HRESIMS spectrum of <b>7</b> . .....             | 28 |
| <b>Figure S38.</b> $^1\text{H}$ NMR spectrum of <b>7</b> . .....    | 28 |
| <b>Figure S39.</b> $^{13}\text{C}$ NMR spectrum of <b>7</b> . ..... | 29 |
| <b>Figure S40.</b> HRESIMS spectrum of <b>8</b> . .....             | 29 |
| <b>Figure S41.</b> $^1\text{H}$ NMR spectrum of <b>8</b> . .....    | 30 |
| <b>Figure S42.</b> $^{13}\text{C}$ NMR spectrum of <b>8</b> . ..... | 30 |
| <b>Figure S43.</b> ESIMS spectrum of <b>9</b> . .....               | 31 |
| <b>Figure S44.</b> $^1\text{H}$ NMR spectrum of <b>9</b> . .....    | 31 |
| <b>Figure S45.</b> $^{13}\text{C}$ NMR spectrum of <b>9</b> . ..... | 32 |

**Table S1.** Selected  $^1\text{H}$  and  $^{13}\text{C}$  NMR data of **2** and similar compounds **13** and **14** in  $\text{CDCl}_3$  and  $\text{C}_5\text{D}_5\text{N}$ .

| position | <b>2</b>                       |                                |                                | <b>13</b>                      |                                |                                | <b>14</b>                      |                                |                                |
|----------|--------------------------------|--------------------------------|--------------------------------|--------------------------------|--------------------------------|--------------------------------|--------------------------------|--------------------------------|--------------------------------|
|          | $\delta_{\text{H}}^{\text{a}}$ | $\delta_{\text{H}}^{\text{b}}$ | $\delta_{\text{C}}^{\text{b}}$ | $\delta_{\text{H}}^{\text{c}}$ | $\delta_{\text{H}}^{\text{d}}$ | $\delta_{\text{C}}^{\text{d}}$ | $\delta_{\text{H}}^{\text{c}}$ | $\delta_{\text{H}}^{\text{d}}$ | $\delta_{\text{C}}^{\text{d}}$ |
| 3        | 4.07 m                         | 4.68 m                         | 67.2 CH                        | 4.02 m                         | 4.65 m                         | 66.8 CH                        | 4.06 m                         | 4.65 m                         | 66.8 CH                        |
| 5        | —                              | —                              | 80.2 C                         | —                              | —                              | 79.8 C                         | —                              | —                              | 79.8 C                         |
| 6        | —                              | —                              | 199.6 C                        | —                              | —                              | 199.2 C                        | —                              | —                              | 199.2 C                        |
| 7        | 5.66 br s <sup>e</sup>         | 5.96 d (1.5)                   | 120.7 CH                       | 5.67 d (2.1)                   | 5.95 d (1.8)                   | 120.3 CH                       | 5.67 d (2.0)                   | 5.93 d (1.8)                   | 120.3 CH                       |
| 8        | —                              | —                              | 164.6 C                        | —                              | —                              | 164.2 C                        | —                              | —                              | 164.2 C                        |
| 9        | —                              | —                              | 75.4 C                         | —                              | —                              | 75.1 C                         | —                              | —                              | 75.0 C                         |
| 10       | —                              | —                              | 42.7 C                         | —                              | —                              | 42.3 C                         | —                              | —                              | 42.3 C                         |
| 14       | 2.72 m                         | 3.00 m                         | 52.3 CH                        | 2.74 m                         | 3.00 m                         | 52.0 CH                        | 2.74 m                         | 2.97 m                         | 51.9 CH                        |
| 17       | 1.39 m                         | 1.37 m                         | 56.7 CH                        | —                              | —                              | 57.0 CH                        | —                              | —                              | 56.3 CH                        |
| 21       | 0.94 d (6.0)                   | 0.99 d (4.5)                   | 19.5 CH <sub>3</sub>           | 0.96 d (6.6)                   | 1.00 d (6.6)                   | 20.3 CH <sub>3</sub>           | 0.94 d (5.8)                   | 1.00 d (6.6)                   | 19.2 CH <sub>3</sub>           |
| OH-3     | —                              | —                              | —                              | —                              | 6.34 d (4.8)                   | —                              | —                              | 6.33 d (4.8)                   | —                              |
| OH-5     | 3.34 br s                      | 8.66 br s                      | —                              | —                              | 8.63 s                         | —                              | —                              | 8.62 s                         | —                              |
| OH-9     | 4.12 br s                      | 6.31 br s                      | —                              | —                              | 6.32 br s                      | —                              | —                              | —                              | —                              |

<sup>a</sup>.  $^1\text{H}$  spectra recorded at 600 MHz in  $\text{CDCl}_3$ ; <sup>b</sup>.  $^{13}\text{C}$  and  $^1\text{H}$  spectra recorded at 125 and 500 MHz in  $\text{C}_5\text{D}_5\text{N}$ ; <sup>c</sup>.  $^1\text{H}$  spectra recorded at 270 MHz in  $\text{CDCl}_3$  [31]; <sup>d</sup>.  $^{13}\text{C}$  and  $^1\text{H}$  spectra recorded at 150 and 600 MHz in  $\text{C}_5\text{D}_5\text{N}$  [31]; <sup>e</sup>. Broad signal.

**Table S2.** Selected  $^{13}\text{C}$  NMR data at C20-C29 of **2** and related compounds **15–18**.

| position           | <b>2</b>                       | <b>15 (24S)</b>                | <b>16 (24R)</b>                | <b>2</b>                       | <b>17 (24S)</b>                | <b>18 (24R)</b>                |
|--------------------|--------------------------------|--------------------------------|--------------------------------|--------------------------------|--------------------------------|--------------------------------|
|                    | $\delta_{\text{C}}^{\text{a}}$ | $\delta_{\text{C}}^{\text{b}}$ | $\delta_{\text{C}}^{\text{b}}$ | $\delta_{\text{C}}^{\text{c}}$ | $\delta_{\text{C}}^{\text{d}}$ | $\delta_{\text{C}}^{\text{d}}$ |
| 20-CH              | 36.44                          | 36.29                          | 36.17                          | 37.23                          | 37.05                          | 36.91                          |
| 21-CH <sub>3</sub> | 18.86                          | 18.82                          | 18.82                          | 19.53                          | 19.16                          | 19.16                          |
| 22-CH <sub>2</sub> | 33.68                          | 33.95                          | 33.95                          | 34.42                          | 34.11                          | 34.16                          |
| 23-CH <sub>2</sub> | 26.35                          | 26.43                          | 26.13                          | 27.16                          | 26.78                          | 26.50                          |
| 24-CH              | 46.00                          | 46.07                          | 45.85                          | 46.74                          | 46.32                          | 46.09                          |
| 25-CH              | 28.90                          | 28.98                          | 29.18                          | 29.72                          | 29.28                          | 29.51                          |
| 26-CH <sub>3</sub> | 18.96                          | 19.07                          | 19.84                          | 19.61                          | 19.16                          | 20.00                          |
| 27-CH <sub>3</sub> | 19.55                          | 19.62                          | 19.07                          | 20.23                          | 19.78                          | 19.27                          |
| 28-CH <sub>2</sub> | 23.03                          | 23.09                          | 23.09                          | 23.83                          | 23.34                          | 23.39                          |
| 29-CH <sub>3</sub> | 12.29                          | 12.32                          | 12.32                          | 12.96                          | 12.52                          | 12.17                          |

<sup>a</sup>.  $^{13}\text{C}$  spectra recorded at 150 MHz in  $\text{CDCl}_3$ ; <sup>b</sup>.  $^{13}\text{C}$  spectra recorded at 25.16 MHz in  $\text{CDCl}_3$  [32].

<sup>c</sup>.  $^{13}\text{C}$  spectra recorded at 150 MHz in  $\text{C}_5\text{D}_5\text{N}$ ; <sup>d</sup>.  $^{13}\text{C}$  spectra recorded at 149.9 MHz in  $\text{C}_5\text{D}_5\text{N}$  [35].

**Table S3.**  $^{13}\text{C}$  and  $^1\text{H}$  NMR data of **3** and related compound **19**.

| (22 <i>E</i> ,24 <i>S</i> )-Ergosta-7,22-dien-3 $\beta$ ,5 $\alpha$ -diol-6,5-olide ( <b>3</b> ) <sup>a</sup> |                            |                       | (22 <i>E</i> ,24 <i>R</i> )-Ergosta-7,22-dien-3 $\beta$ ,5 $\alpha$ -diol-6,5-olide ( <b>19</b> ) <sup>b</sup> |                       |
|---------------------------------------------------------------------------------------------------------------|----------------------------|-----------------------|----------------------------------------------------------------------------------------------------------------|-----------------------|
| position                                                                                                      | $\delta_{\text{H}}$        | $\delta_{\text{C}}$   | $\delta_{\text{H}}$                                                                                            | $\delta_{\text{C}}$   |
| 1                                                                                                             | 1.95, m<br>1.40, m         | 35.9, CH <sub>2</sub> | 1.93, m<br>1.40, m                                                                                             | 35.8, CH <sub>2</sub> |
| 2                                                                                                             | 1.86, m<br>1.40, m         | 30.4, CH <sub>2</sub> | 1.85, m<br>1.40, m                                                                                             | 30.4, CH <sub>2</sub> |
| 3                                                                                                             | 3.79, m                    | 67.6, CH              | 3.79, m                                                                                                        | 67.6, CH              |
| 4                                                                                                             | 2.25, m<br>2.10, m         | 46.2, CH <sub>2</sub> | 2.28, m<br>2.11, m                                                                                             | 46.1, CH <sub>2</sub> |
| 5                                                                                                             | –                          | 104.3, C              | –                                                                                                              | 104.3, C              |
| 6                                                                                                             | –                          | 166.4, C              | –                                                                                                              | 166.6, C              |
| 7                                                                                                             | 5.70, br s <sup>c</sup>    | 115.3, CH             | 5.69, s                                                                                                        | 115.2, CH             |
| 8                                                                                                             | –                          | 159.7, C              | –                                                                                                              | 159.4, C              |
| 9                                                                                                             | 2.26, m                    | 51.7, CH              | 2.25, m                                                                                                        | 51.7, CH              |
| 10                                                                                                            | –                          | 43.1, C               | –                                                                                                              | 42.8, C               |
| 11                                                                                                            | 1.82, m<br>1.64, m         | 25.3, CH <sub>2</sub> | 1.82, m<br>1.64, m                                                                                             | 25.3, CH <sub>2</sub> |
| 12                                                                                                            | 2.05, m<br>1.42, m         | 39.9, CH <sub>2</sub> | 2.05, m<br>1.41, m                                                                                             | 39.9, CH <sub>2</sub> |
| 13                                                                                                            | –                          | 46.6, C               | –                                                                                                              | 46.6, C               |
| 14                                                                                                            | 2.14, m                    | 58.1, CH              | 2.13, m                                                                                                        | 58.0, CH              |
| 15                                                                                                            | 1.58, m<br>1.50, m         | 23.1, CH <sub>2</sub> | 1.53, m<br>1.49, m                                                                                             | 23.0, CH <sub>2</sub> |
| 16                                                                                                            | 1.77, m<br>1.33, m         | 28.0, CH <sub>2</sub> | 1.76, m<br>1.36, m                                                                                             | 27.7, CH <sub>2</sub> |
| 17                                                                                                            | 1.37, m                    | 56.3, CH              | 1.35, m                                                                                                        | 56.4, CH              |
| 18                                                                                                            | 0.62, s                    | 12.4, CH <sub>3</sub> | 0.62, s                                                                                                        | 12.5, CH <sub>3</sub> |
| 19                                                                                                            | 1.06, s                    | 17.8, CH <sub>3</sub> | 1.05, s                                                                                                        | 17.7, CH <sub>3</sub> |
| 20                                                                                                            | 2.05, m                    | 40.4, CH              | 2.03, m                                                                                                        | 40.3, CH              |
| 21                                                                                                            | 1.01, d (6.0) <sup>d</sup> | 21.0, CH <sub>3</sub> | 1.01, d (6.6)                                                                                                  | 21.0, CH <sub>3</sub> |
| 22                                                                                                            | 5.13, dd (15.0, 7.8)       | 135.2, CH             | 5.14, dd (15.2, 8.5)                                                                                           | 135.0, CH             |
| 23                                                                                                            | 5.21, dd (15.0, 8.4)       | 132.7, CH             | 5.23, dd (15.3, 7.8)                                                                                           | 132.6, CH             |
| 24                                                                                                            | 1.85, m                    | 43.1, CH              | 1.85, m                                                                                                        | 42.8, CH              |
| 25                                                                                                            | 1.47, m                    | 33.2, CH              | 1.47, m                                                                                                        | 33.0, CH              |
| 26                                                                                                            | 0.82, d (6.6)              | 19.6, CH <sub>3</sub> | 0.84, d (6.9)                                                                                                  | 19.9, CH <sub>3</sub> |
| 27                                                                                                            | 0.84, d (7.2)              | 20.1, CH <sub>3</sub> | 0.82, d (6.8)                                                                                                  | 19.6, CH <sub>3</sub> |
| 28                                                                                                            | 0.92, d (7.2)              | 18.0, CH <sub>3</sub> | 0.91, d (6.8)                                                                                                  | 17.6, CH <sub>3</sub> |
| OH-5                                                                                                          |                            |                       | 3.99, brs                                                                                                      |                       |

<sup>a</sup>.  $^{13}\text{C}$  and  $^1\text{H}$  spectra recorded at 150 and 600 MHz in  $\text{CDCl}_3$ ; <sup>b</sup>.  $^{13}\text{C}$  and  $^1\text{H}$  spectra recorded at 150 and 600 MHz in  $\text{CDCl}_3$  [36]; <sup>c</sup>. Broad signal; <sup>d</sup>.  $J$  values (Hz) in parentheses.

**Table S4.** Cytotoxicity of compounds **1–9**.

| Compound  | Huh7 cell viability                |                                  |                                   |
|-----------|------------------------------------|----------------------------------|-----------------------------------|
|           | 12.5 $\mu$ M<br>(%, mean $\pm$ SD) | 50 $\mu$ M<br>(%, mean $\pm$ SD) | 200 $\mu$ M<br>(%, mean $\pm$ SD) |
| <b>1</b>  | — <sup>a</sup>                     | —                                | —                                 |
| <b>2</b>  | —                                  | —                                | —                                 |
| <b>3</b>  | —                                  | —                                | —                                 |
| <b>4</b>  | —                                  | —                                | —                                 |
| <b>5</b>  | —                                  | 83.0 $\pm$ 3.8                   | 56.8 $\pm$ 2.3                    |
| <b>6</b>  | —                                  | —                                | —                                 |
| <b>7</b>  | —                                  | —                                | —                                 |
| <b>8</b>  | —                                  | 68.1 $\pm$ 1.1                   | 46.6 $\pm$ 0.7                    |
| <b>9</b>  | —                                  | 100.2 $\pm$ 2.7                  | 97.7 $\pm$ 2.3                    |
| Sorafenib | 47.7 $\pm$ 0.3                     |                                  |                                   |

<sup>a</sup> viability %>100. Results are presented as mean  $\pm$  SD. (n = 3).

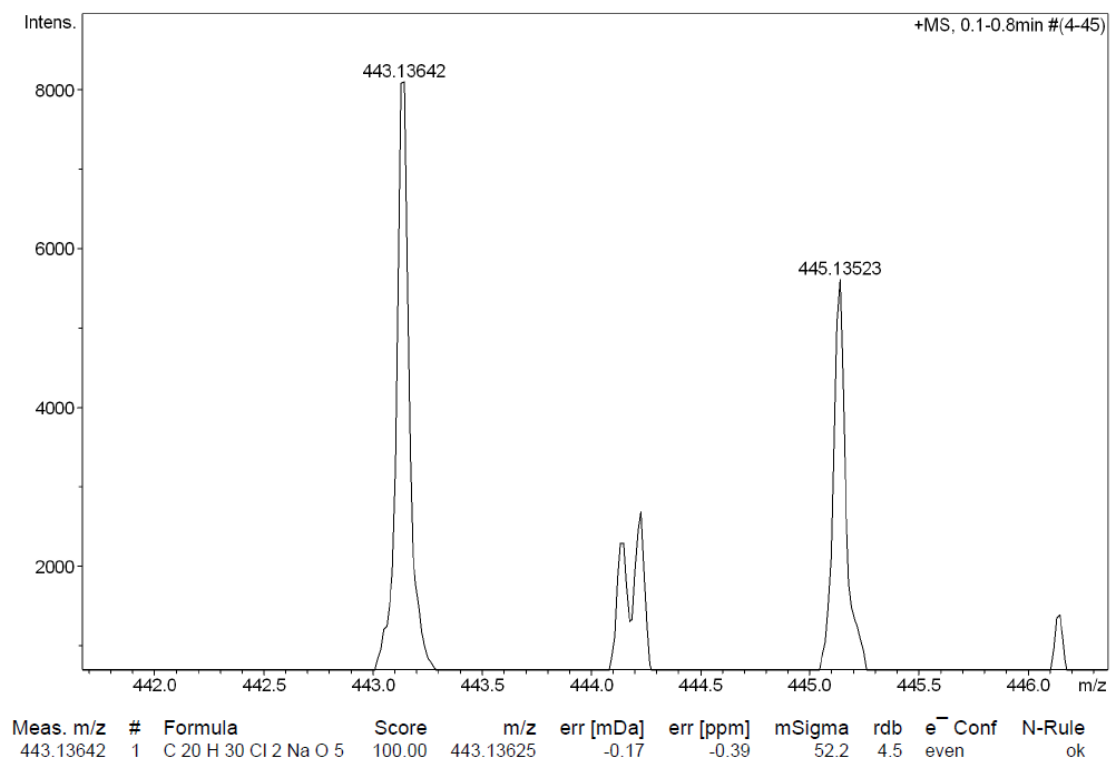

**Figure S1.** HRESIMS spectrum of **1**.

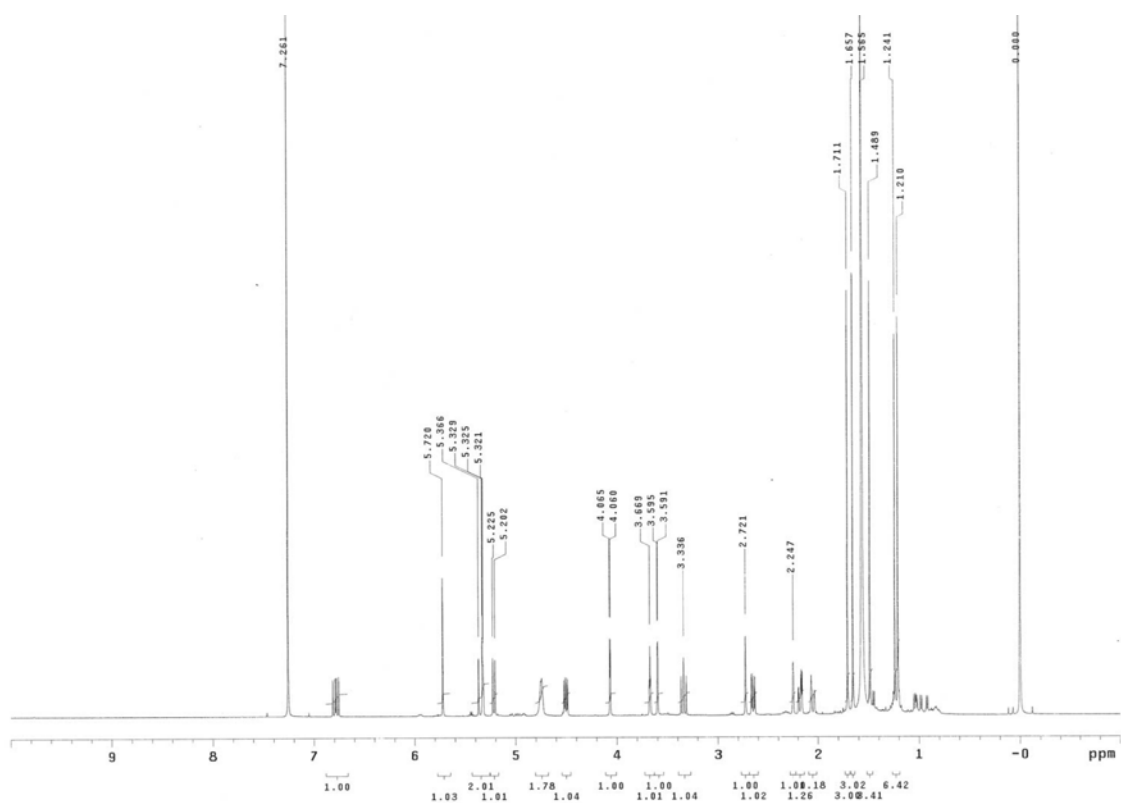

**Figure S2.** <sup>1</sup>H NMR spectrum of **1**.

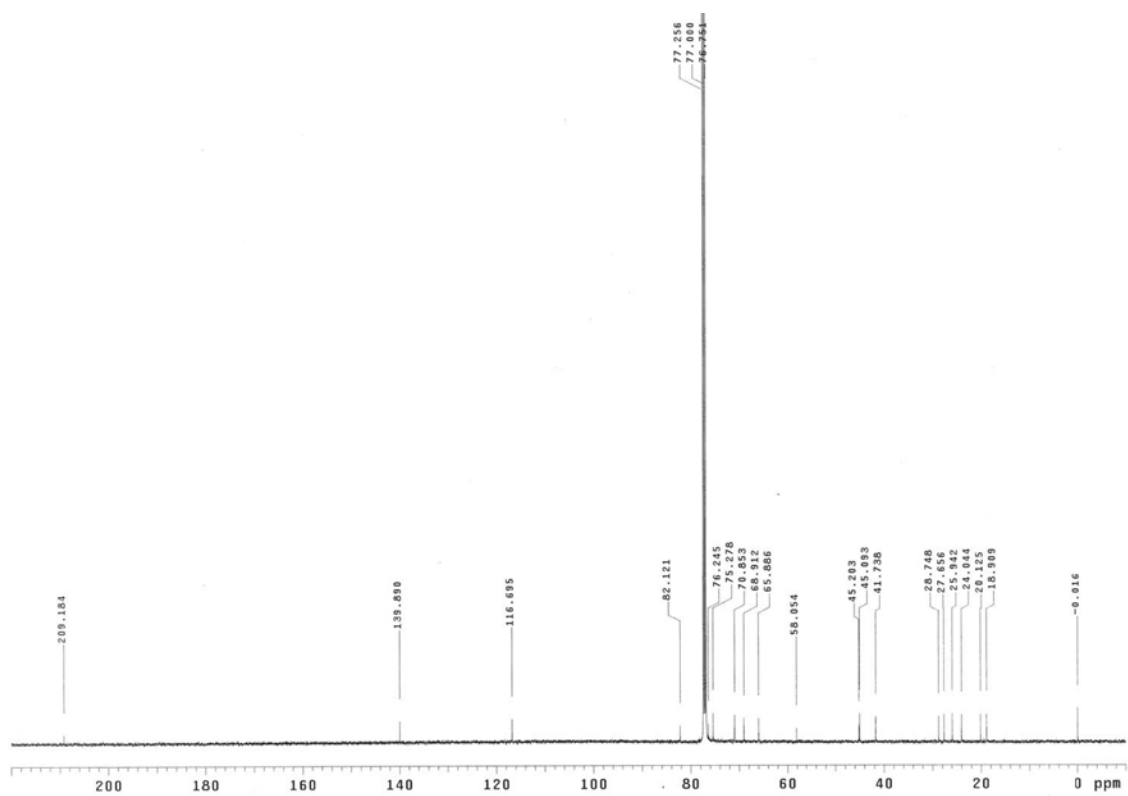

**Figure S3.** <sup>13</sup>C NMR spectrum of **1**.

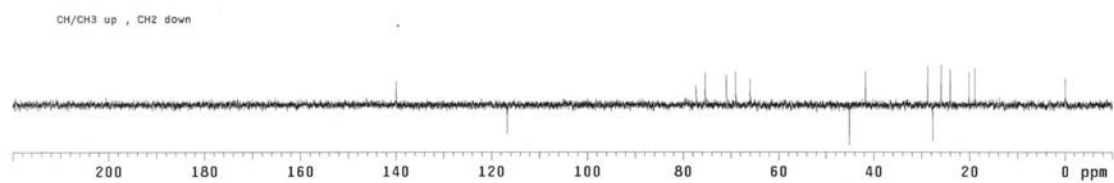

**Figure S4.** DEPT spectrum of **1**.



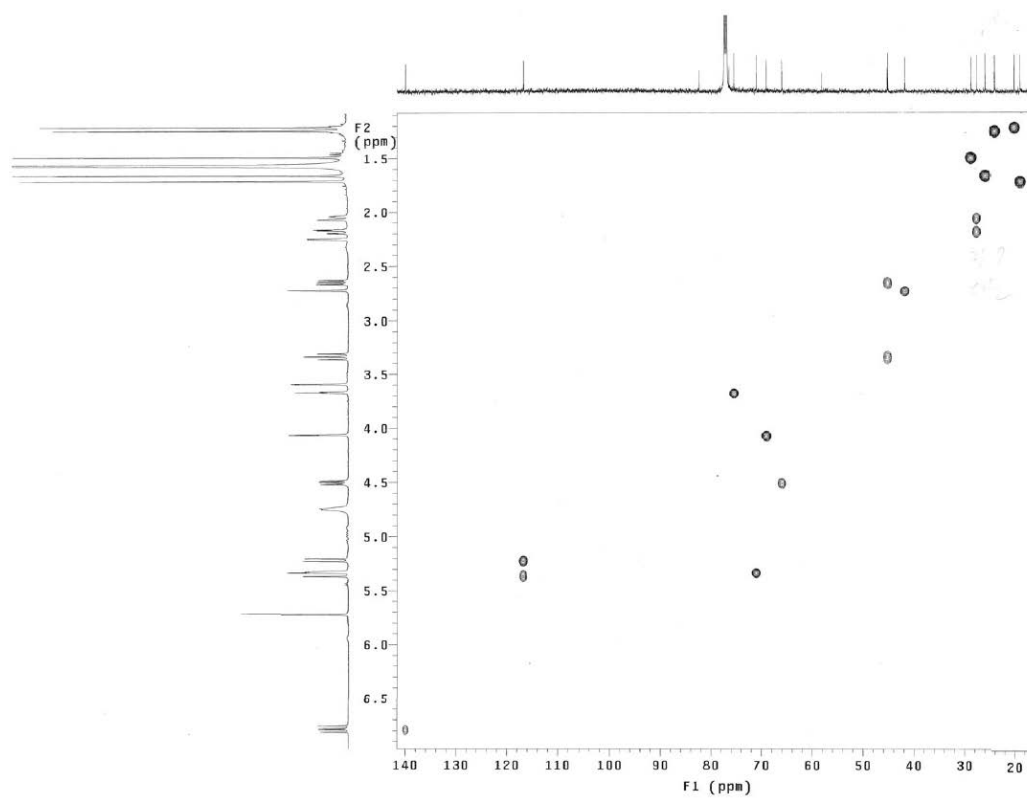

**Figure S5.** HSQC spectrum of **1**

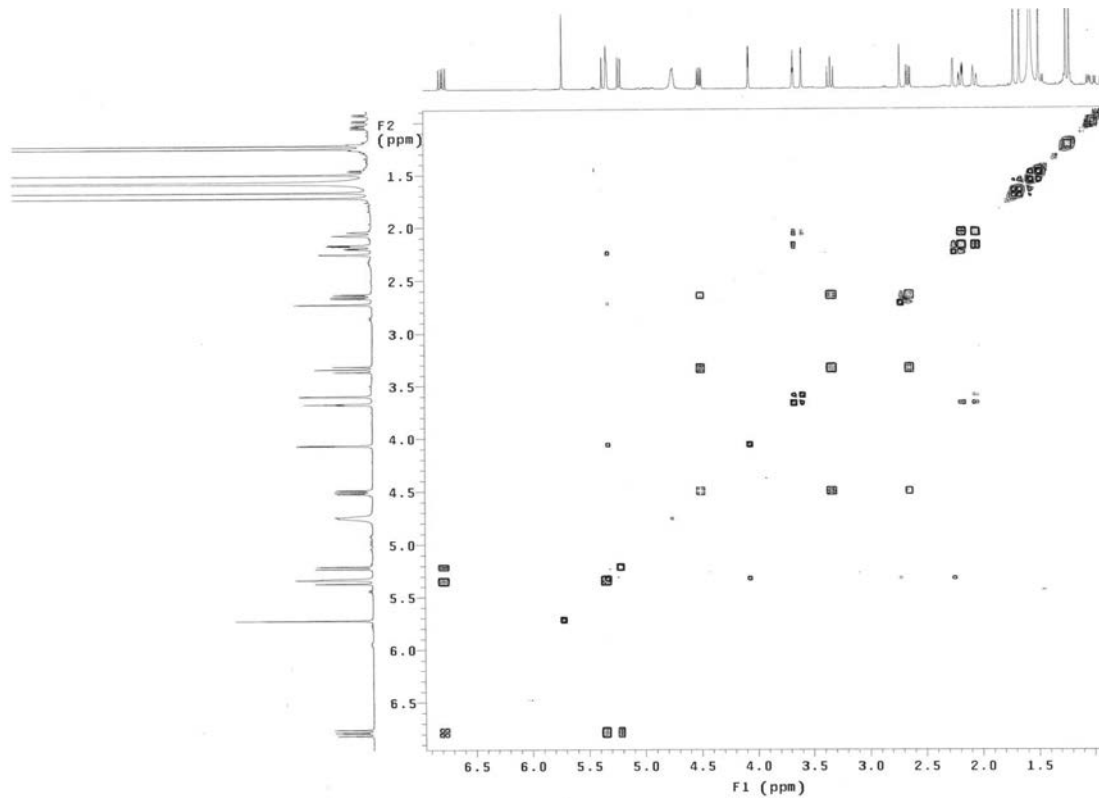

**Figure S6.**  $^1\text{H}$ - $^1\text{H}$  COSY spectrum of **1**.

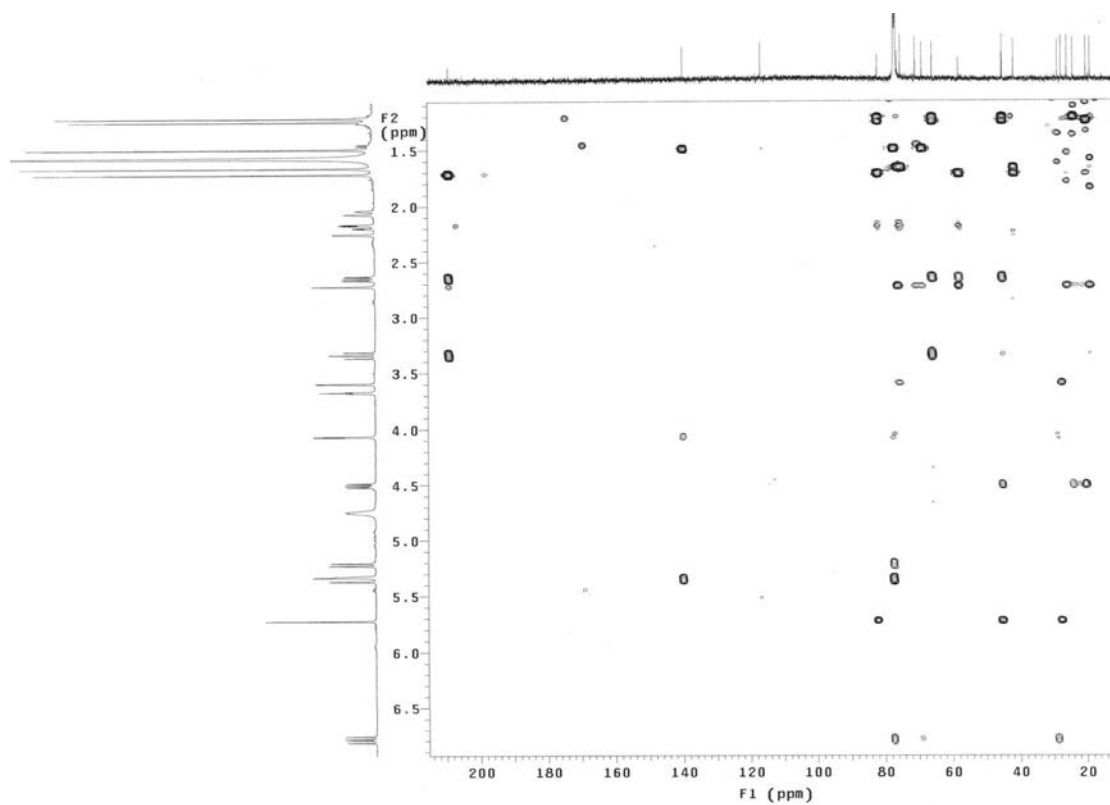

**Figure S7.** HMBC spectrum of **1**.

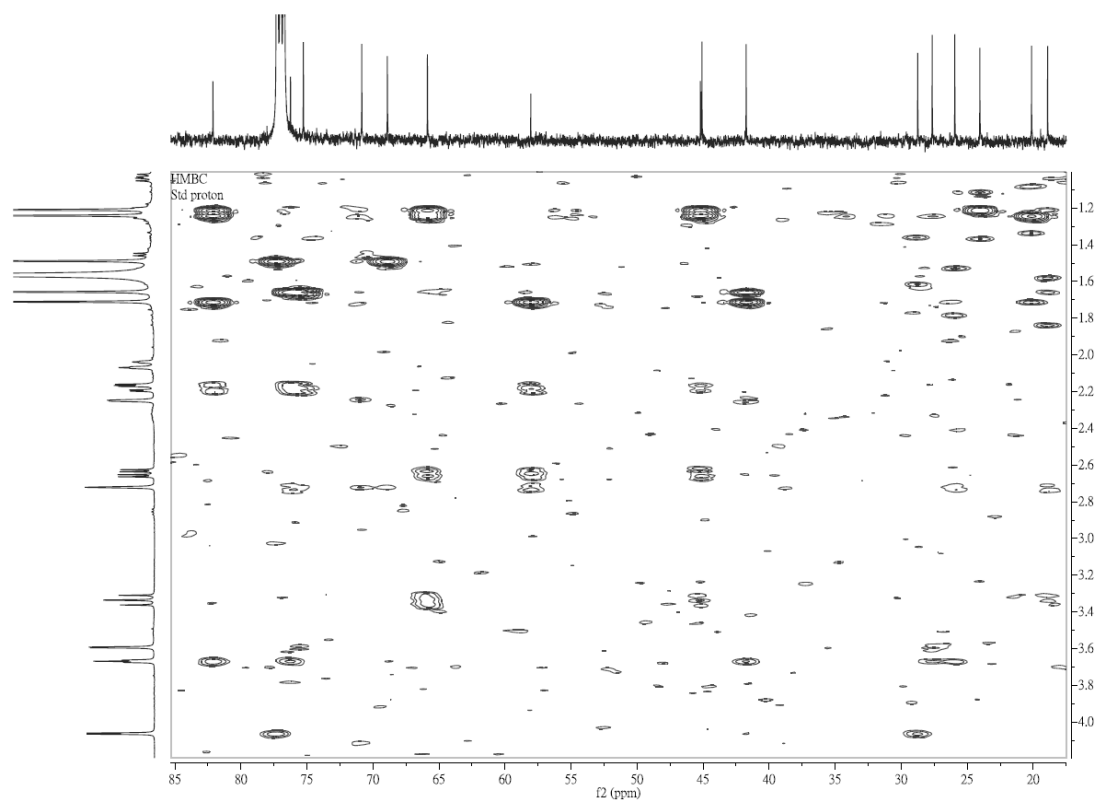

**Figure S8.** The partial HMBC spectrum of **1**.

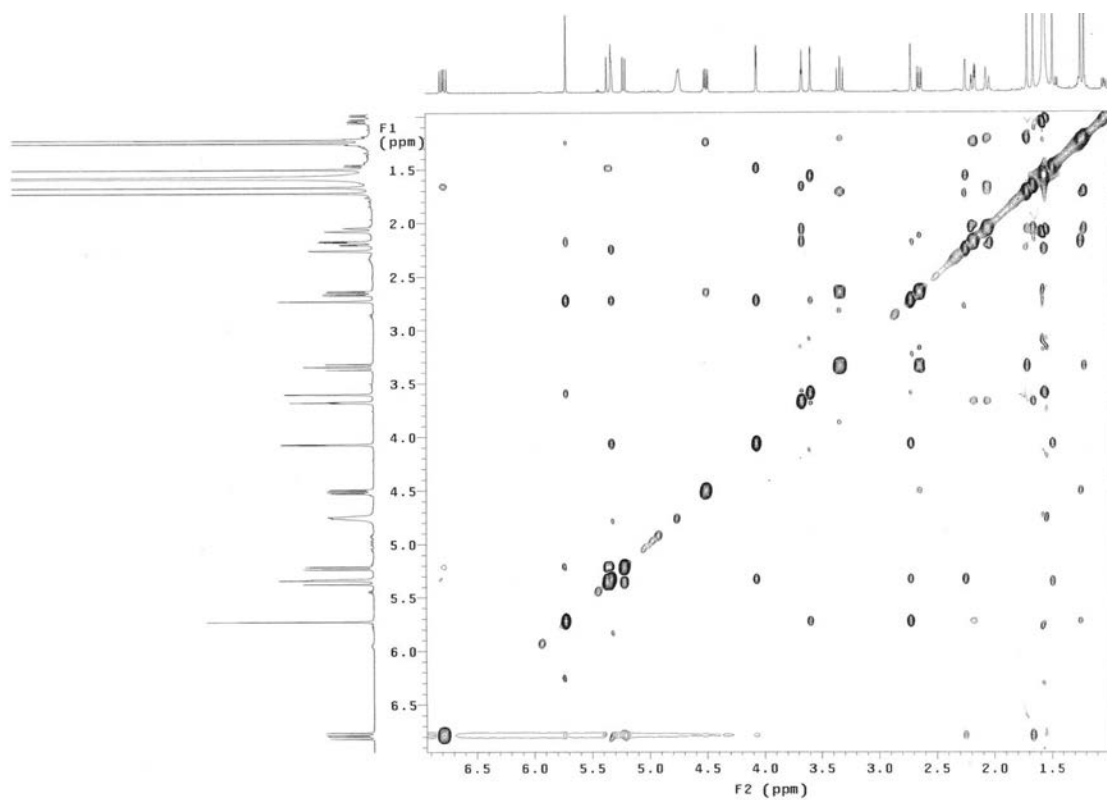

**Figure S9.** NOESY spectrum of **1**.

**Table S5.** The cartesian coordinates of conformer of compound **1** at the B3LYP/6-311+G(d,p) level of theory.

|    |            |            |            |   |            |            |            |
|----|------------|------------|------------|---|------------|------------|------------|
| C  | -2.9986360 | 1.8877370  | -0.0588340 | H | -1.2717860 | -2.2681090 | 1.3382890  |
| C  | -3.7943200 | 0.6610420  | -0.5062620 | H | -1.7591470 | -2.9274280 | -0.2096550 |
| C  | -3.3435710 | -0.6788630 | 0.1338760  | H | 0.6487820  | -3.2629890 | 0.2542500  |
| C  | -1.7765200 | -0.7617600 | -0.1585970 | H | 0.5068930  | 0.1495050  | -1.1191040 |
| C  | -0.8948330 | 0.4397040  | 0.4432860  | H | 2.5349820  | 1.0369040  | -1.7287260 |
| C  | -1.4938990 | 1.6834840  | -0.2455520 | H | 1.1921810  | 2.2557270  | -0.2214640 |
| C  | -1.1849450 | -2.1240730 | 0.2590610  | H | -3.5397210 | 0.1184680  | 2.2012730  |
| C  | 0.2780340  | -2.3128360 | -0.1543390 | H | -4.8162240 | -0.9733200 | 1.6892420  |
| C  | 1.1922890  | -1.1769320 | 0.3706160  | H | -3.2346040 | -1.6193630 | 2.1099760  |
| C  | 0.5856710  | 0.2001460  | -0.0288130 | H | -5.1329310 | -1.6542570 | -0.6238330 |
| C  | 3.4894010  | -0.4005040 | -0.4287980 | H | -3.6990360 | -1.9308070 | -1.6346750 |
| C  | 2.8443320  | 0.9877060  | -0.6832990 | H | -3.8998910 | -2.7904210 | -0.0913640 |
| C  | 1.6165450  | 1.3357250  | 0.1818480  | H | -0.9610090 | -1.2045570 | -1.8999630 |
| O  | -0.8595970 | 2.4765970  | -0.9186200 | H | -1.0266780 | -0.3072980 | 2.5200490  |
| C  | -3.7416620 | -0.7821250 | 1.6215800  | H | -0.0961750 | 1.1794210  | 2.3240370  |
| C  | -4.0547590 | -1.8375840 | -0.6064030 | H | -1.8527440 | 1.2217580  | 2.2843840  |
| O  | -1.6889970 | -0.6228420 | -1.5902820 | H | 1.2521800  | -2.1763810 | -1.8186740 |
| C  | -0.9807530 | 0.6416750  | 1.9829120  | H | 1.8956500  | -0.5863440 | 2.3698540  |
| O  | 0.3252970  | -2.3854420 | -1.5893640 | H | 0.5679170  | -1.7439430 | 2.3913890  |
| C  | 1.4756330  | -1.4494030 | 1.8593440  | H | 2.1800200  | -2.2838030 | 1.9230240  |
| O  | 1.9441120  | 1.5255760  | 1.5582090  | H | 2.4776600  | 2.3363060  | 1.6134200  |
| Cl | 4.0927740  | 2.3301760  | -0.5249340 | H | 3.8594310  | 0.1052020  | 1.6969080  |
| C  | 4.2863140  | -0.4509240 | 0.8693510  | H | 5.9148390  | -1.1134010 | 2.0277610  |
| C  | 5.4269760  | -1.1162060 | 1.0564060  | H | 5.9237080  | -1.6830200 | 0.2744800  |
| C  | 4.3164920  | -0.8257280 | -1.6459740 | H | 5.1872700  | -0.1779720 | -1.7731310 |
| O  | 2.3998580  | -1.3713070 | -0.4146020 | H | 4.6584920  | -1.8573050 | -1.5300960 |
| Cl | -5.5885870 | 1.0222630  | -0.2108500 | H | 3.7013190  | -0.7728530 | -2.5492760 |
| H  | -3.2870290 | 2.7628160  | -0.6449270 |   |            |            |            |
| H  | -3.2114450 | 2.1065750  | 0.9924680  |   |            |            |            |
| H  | -3.7362000 | 0.5670940  | -1.5887490 |   |            |            |            |

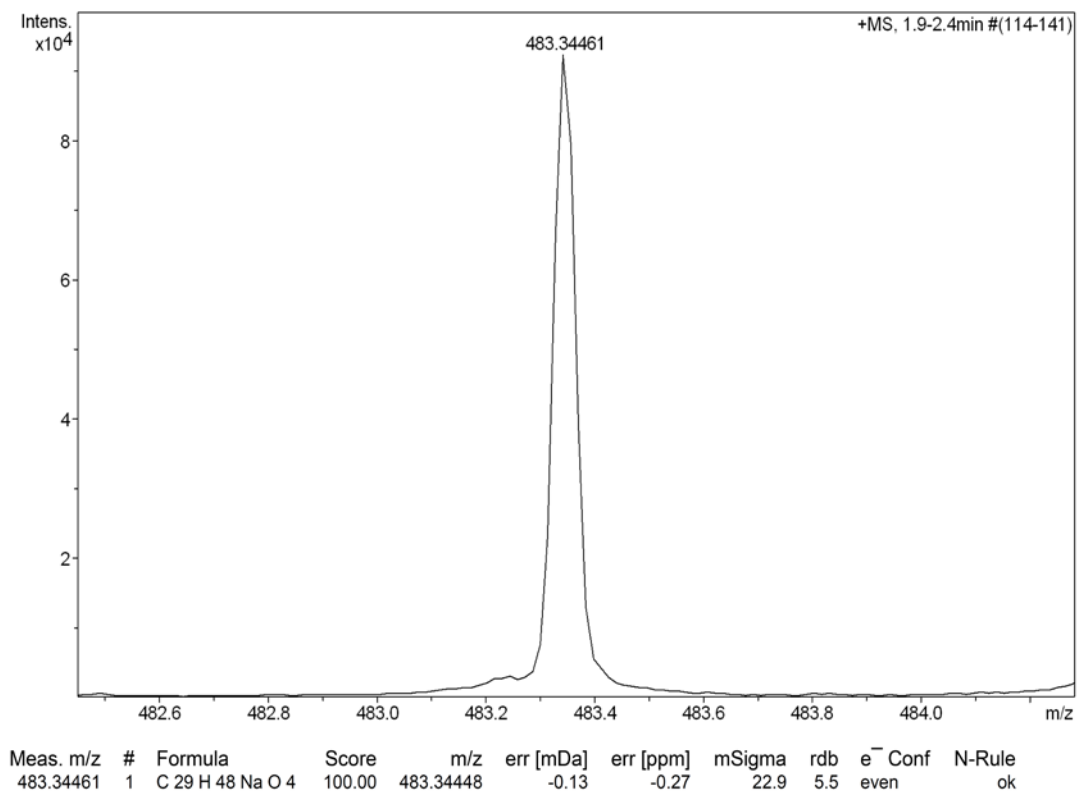

**Figure S10.** HRESIMS spectrum of **2**.

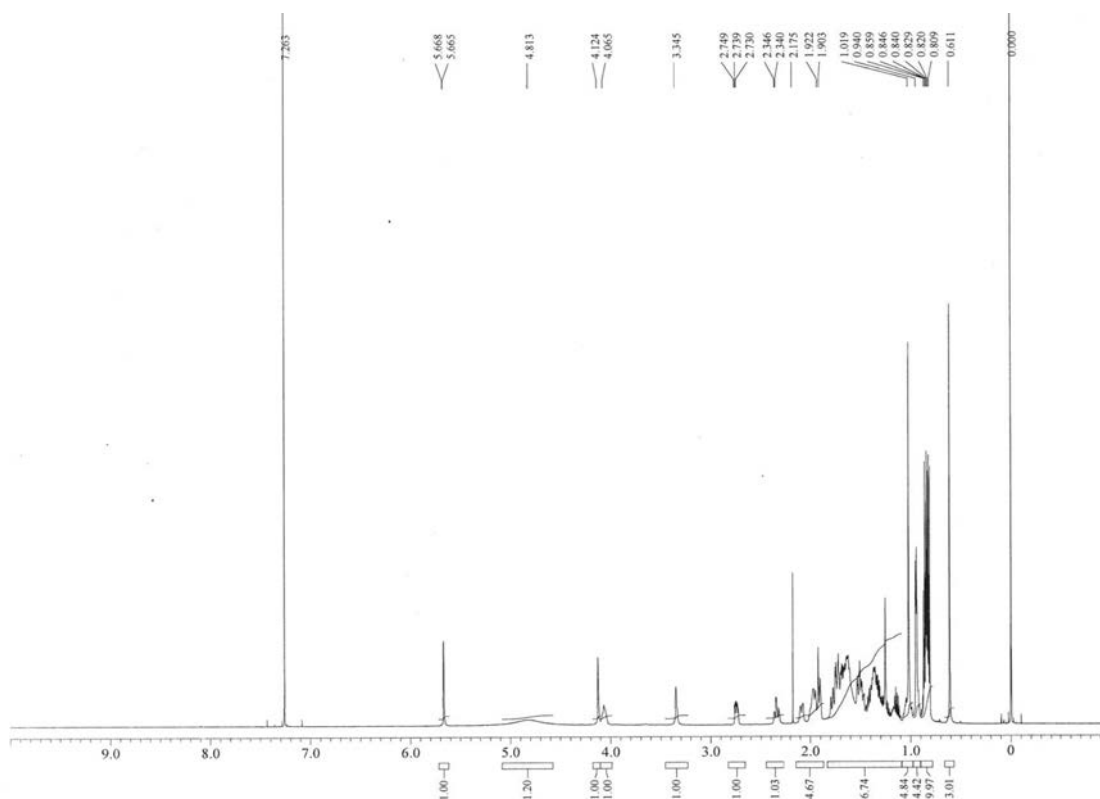

**Figure S11.**  $^1\text{H}$  NMR spectrum of **2**.

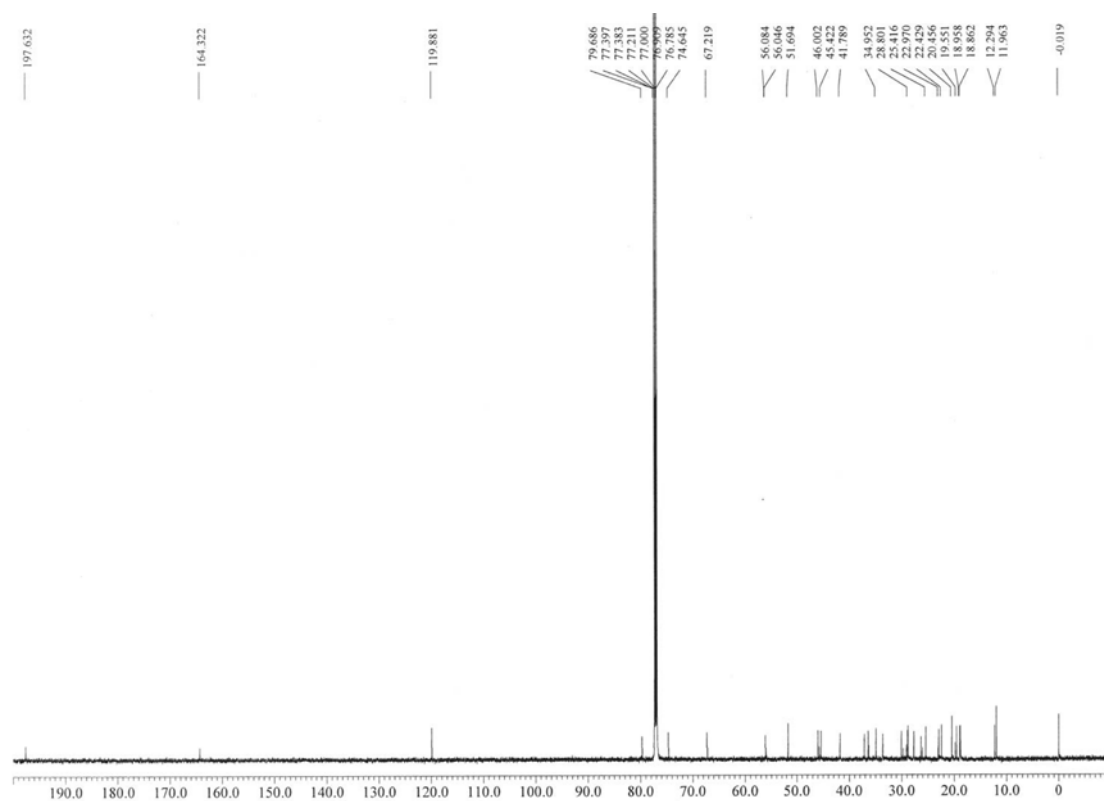

**Figure S12.**  $^{13}\text{C}$  NMR spectrum of **2**.

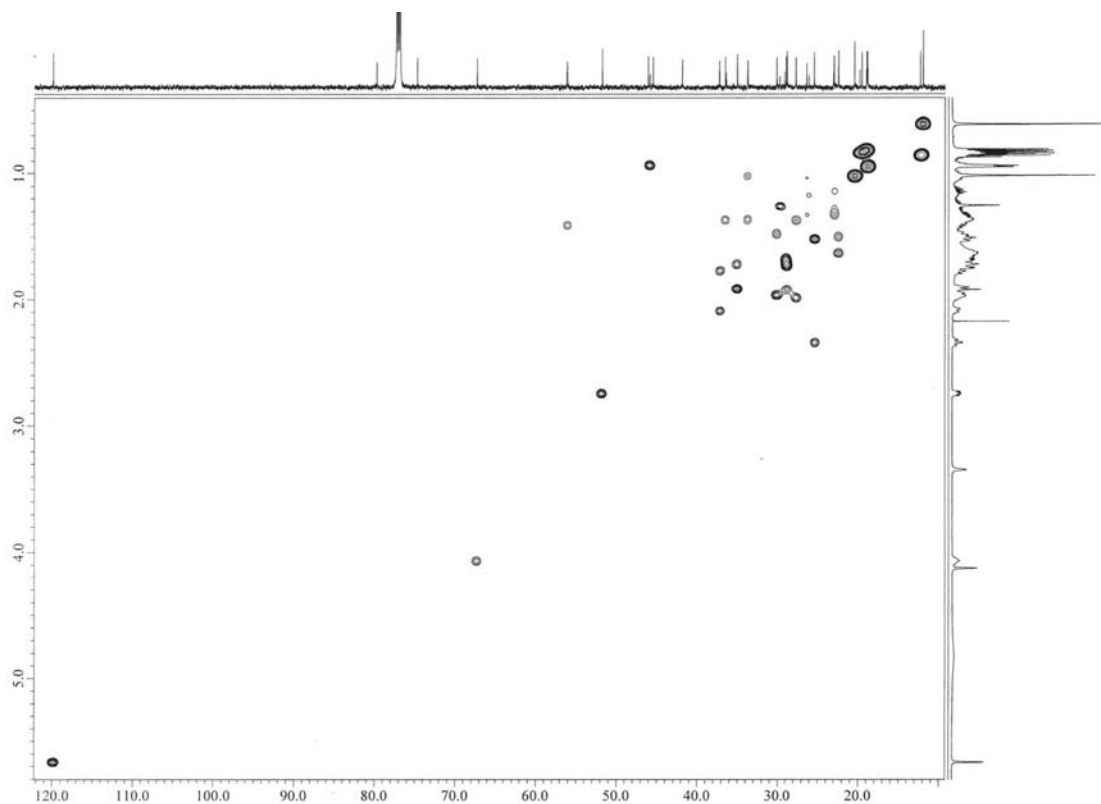

**Figure S13.** HSQC spectrum of **2**.

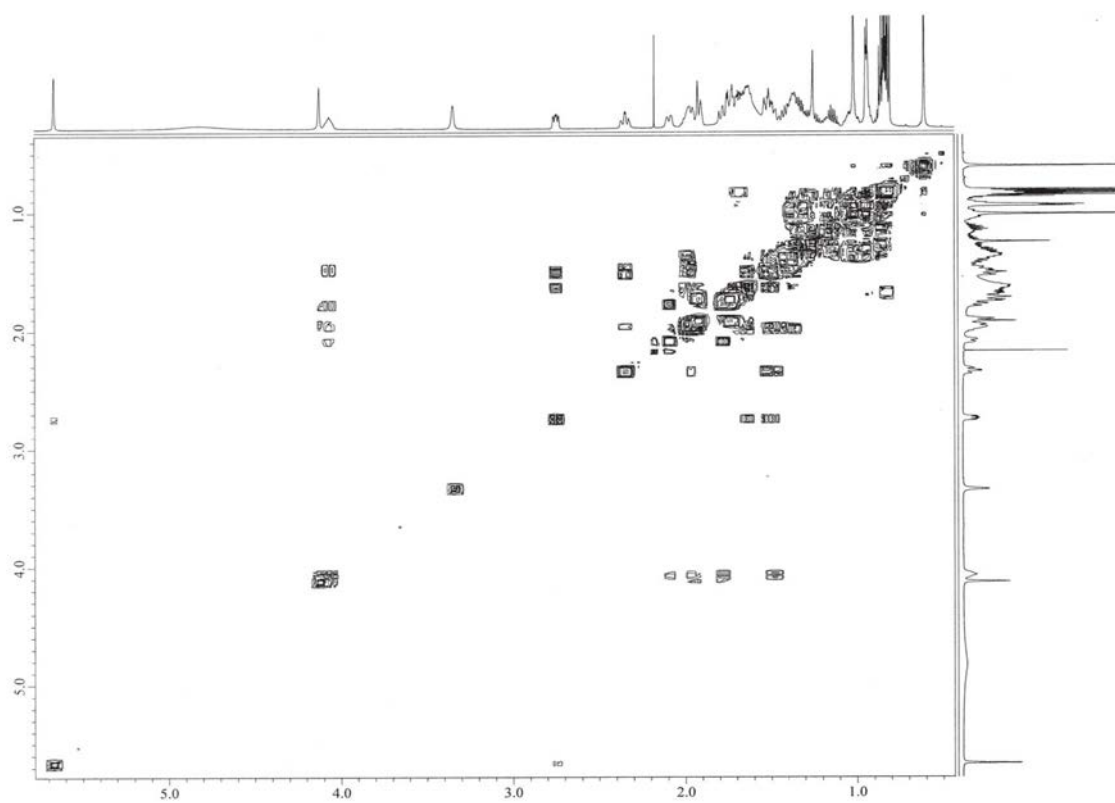

**Figure S14.**  $^1\text{H}$ – $^1\text{H}$  COSY spectrum of **2**.

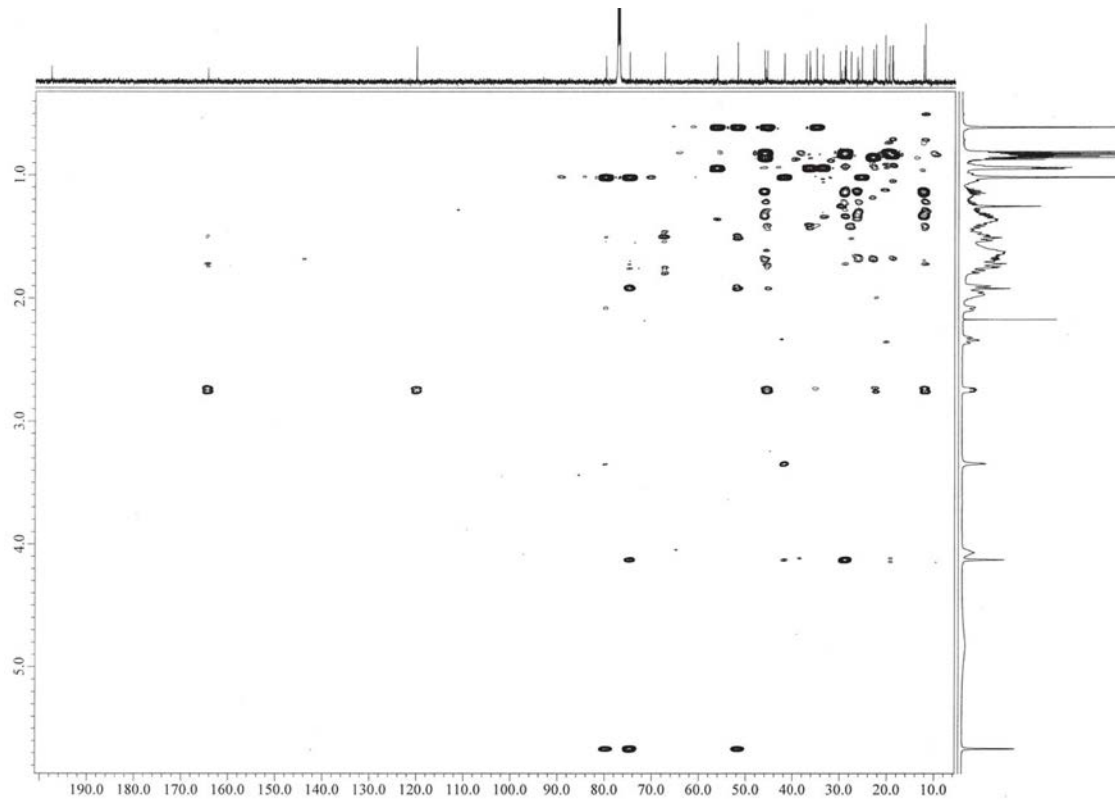

**Figure S15.** HMBC spectrum of **2**.

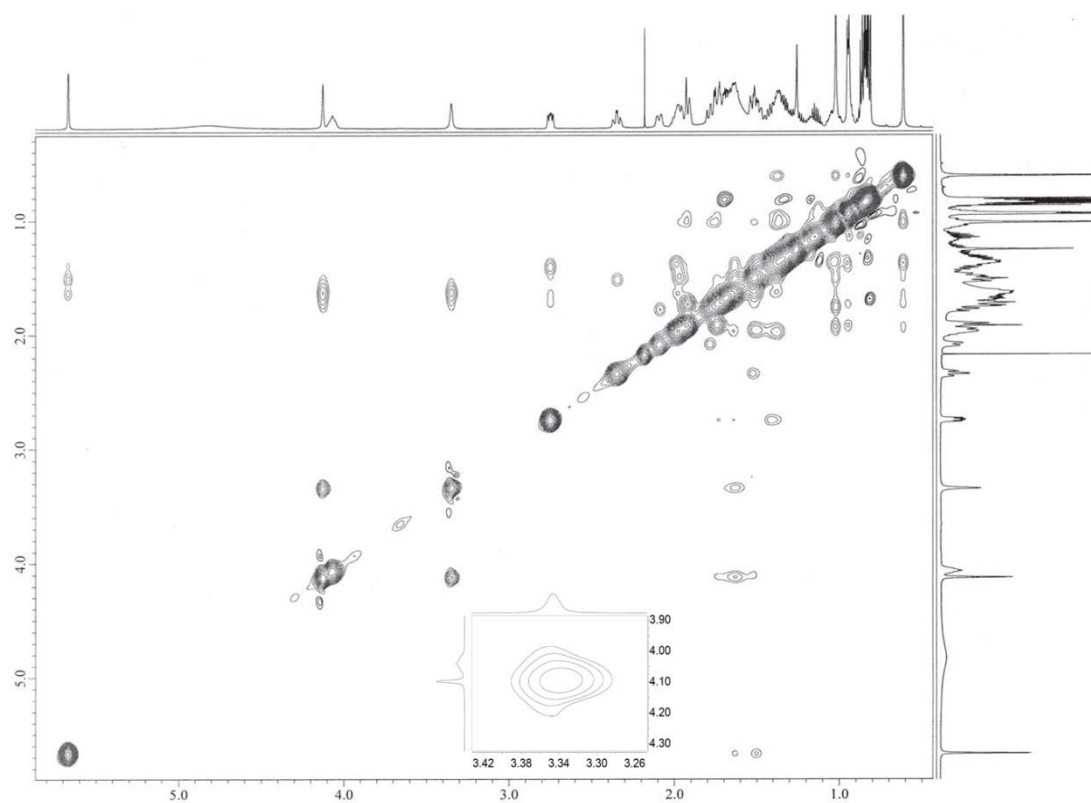

**Figure S16.** NOESY spectrum of **2**.



**Table S6.** The cartesian coordinates of conformer of compound **2** at the CAM-B3LYP/6-311+G(d,p) level of theory.

|   |            |            |            |   |            |            |            |
|---|------------|------------|------------|---|------------|------------|------------|
| C | 6.2305810  | -1.6396570 | 0.6163380  | H | 7.0443720  | -0.4354460 | -0.9734960 |
| C | 6.9197530  | -0.3659450 | 0.1172350  | H | 6.0775560  | 1.0369490  | 1.5178150  |
| C | 6.0833720  | 0.8735400  | 0.4354540  | H | 6.5476330  | 1.7652380  | -0.0008870 |
| C | 4.6527430  | 0.7467790  | -0.1018590 | H | 4.8416870  | -1.9113270 | -1.0211990 |
| C | 3.9133330  | -0.5410780 | 0.3848590  | H | 4.3361900  | -2.6725280 | 0.4762660  |
| C | 4.8022170  | -1.7714030 | 0.0624760  | H | 1.8160400  | 2.8104100  | -0.0927900 |
| C | 3.7993310  | 1.9943870  | 0.2080710  | H | 0.4470720  | 0.2183380  | -1.8739620 |
| C | 2.3680720  | 1.8742740  | -0.0745270 | H | -0.3558200 | -2.5972080 | 0.2326450  |
| C | 1.7637800  | 0.7018150  | -0.3616830 | H | 0.1822250  | -2.0516460 | -1.3514400 |
| C | 2.5123280  | -0.6476710 | -0.3537570 | H | 1.5843870  | -1.6550070 | 1.3361150  |
| C | 0.3468450  | 0.6156240  | -0.8511720 | H | 2.1040440  | -2.7180240 | 0.0398270  |
| C | -0.5350890 | -0.4351170 | -0.1071540 | H | -0.4593810 | 2.4618680  | -0.0190630 |
| C | 0.1741860  | -1.7917200 | -0.2855740 | H | -0.2226800 | 2.5279840  | -1.7622000 |
| C | 1.6191700  | -1.7585730 | 0.2498520  | H | -2.3406930 | 1.5186580  | -2.1288010 |
| C | -0.5250940 | 1.8712670  | -0.9398680 | H | -2.6516210 | 1.7665400  | -0.4198670 |
| C | -1.9565030 | 1.3001400  | -1.1279640 | H | -1.7378920 | -0.7330280 | -1.8637430 |
| C | -1.8821670 | -0.2466420 | -0.8857930 | H | 2.9097440  | 0.2620790  | 2.1839030  |
| C | 3.7031370  | -0.4429460 | 1.9188000  | H | 3.4379350  | -1.4192340 | 2.3330460  |
| C | -0.7047540 | -0.0792590 | 1.3853950  | H | 4.6095310  | -0.1195030 | 2.4347230  |
| C | -3.1950030 | -0.8180830 | -0.2898440 | H | -1.2374510 | -0.8751020 | 1.9173470  |
| C | -3.1204970 | -2.3251150 | 0.0058390  | H | 0.2581290  | 0.0626860  | 1.8865630  |
| C | -4.3740290 | -0.5063500 | -1.2471110 | H | -1.2772860 | 0.8438870  | 1.5220340  |
| C | -5.7842360 | -0.9275460 | -0.7866140 | H | -3.3828190 | -0.2968940 | 0.6602140  |
| C | -6.2862030 | -0.3293570 | 0.5473580  | H | -4.0809920 | -2.7062630 | 0.3675820  |
| C | -6.2972590 | 1.2301070  | 0.5650850  | H | -2.8577470 | -2.8921460 | -0.8968100 |
| C | -6.7589520 | 1.7894870  | 1.9210240  | H | -2.3782420 | -2.5567320 | 0.7741110  |
| O | 8.1957620  | -0.1684150 | 0.7364680  | H | -4.3826550 | 0.5667780  | -1.4664940 |
| O | 4.3144650  | 3.0518070  | 0.5631810  | H | -4.1719520 | -1.0040350 | -2.2079890 |
| O | 4.7190940  | 0.6686540  | -1.5549500 | H | -5.8309200 | -2.0215250 | -0.7047040 |
| C | -7.5861180 | -1.0383980 | 1.0127870  | H | -6.4822810 | -0.6699480 | -1.5932830 |
| C | -8.8284550 | -0.9530020 | 0.1132270  | H | -5.5457880 | -0.6045360 | 1.3149290  |
| C | -7.0600960 | 1.9179080  | -0.5813810 | H | -5.2443550 | 1.5282780  | 0.4531350  |
| O | 2.6782600  | -1.0242650 | -1.7337970 | H | -7.8326900 | 1.6335680  | 2.0808980  |
| H | 6.8191310  | -2.5171190 | 0.3163080  | H | -6.5740910 | 2.8691580  | 1.9761120  |
| H | 6.2270070  | -1.6245040 | 1.7136290  | H | -6.2245750 | 1.3160290  | 2.7541620  |

|   |            |            |            |
|---|------------|------------|------------|
| H | 8.7503770  | -0.9293080 | 0.4995580  |
| H | 5.1537180  | 1.4722370  | -1.8872640 |
| H | -7.8518300 | -0.6802450 | 2.0152950  |
| H | -7.3339510 | -2.1008830 | 1.1403500  |
| H | -9.6138730 | -1.6163450 | 0.4951960  |
| H | -8.6128970 | -1.2607870 | -0.9160140 |
| H | -9.2478760 | 0.0572560  | 0.0774890  |
| H | -6.8922180 | 3.0013980  | -0.5418690 |
| H | -8.1405780 | 1.7547490  | -0.5157230 |
| H | -6.7297230 | 1.5722150  | -1.5667160 |
| H | 3.3211070  | -0.3840290 | -2.0991460 |

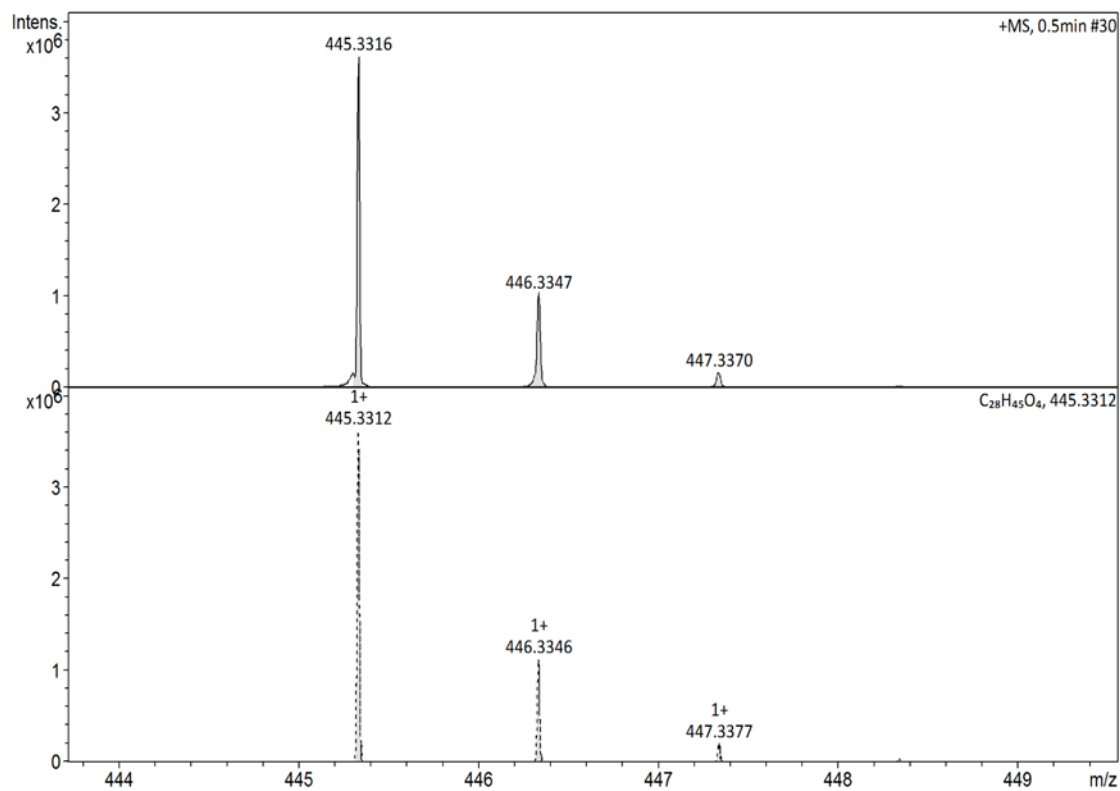

**Figure S17.** HRESIMS spectrum of **3**.

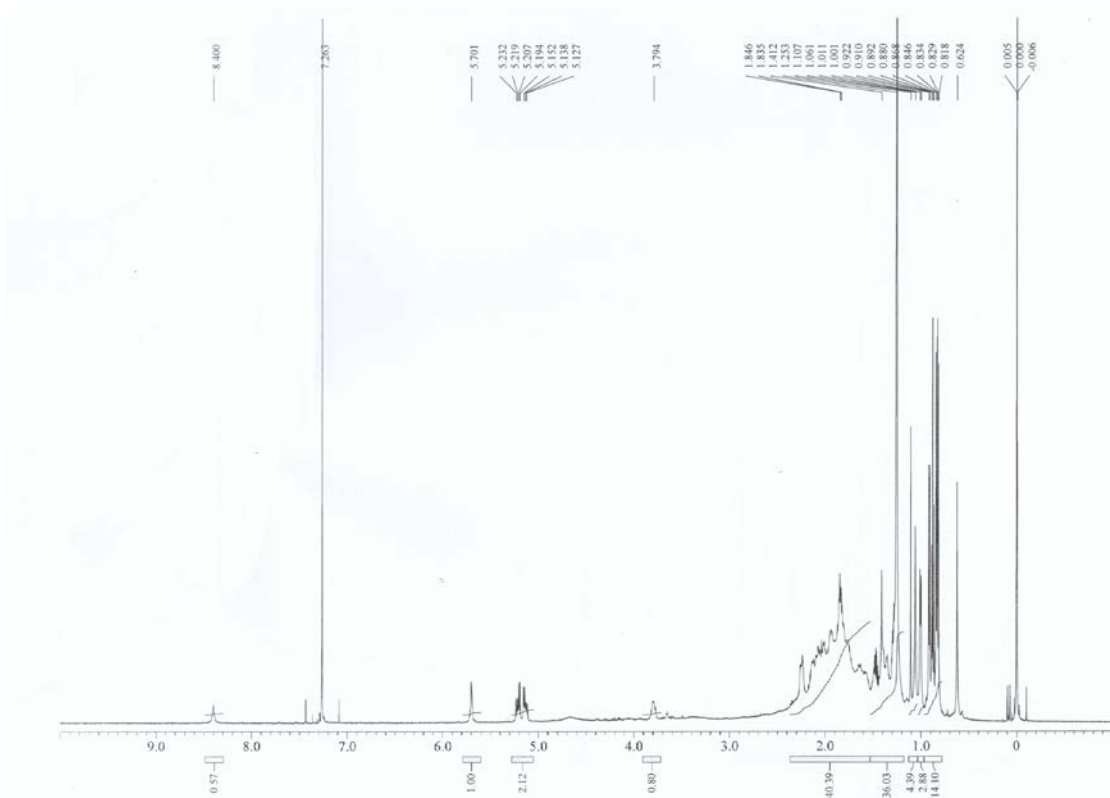

**Figure S18.**  $^1H$  NMR spectrum of **3**.

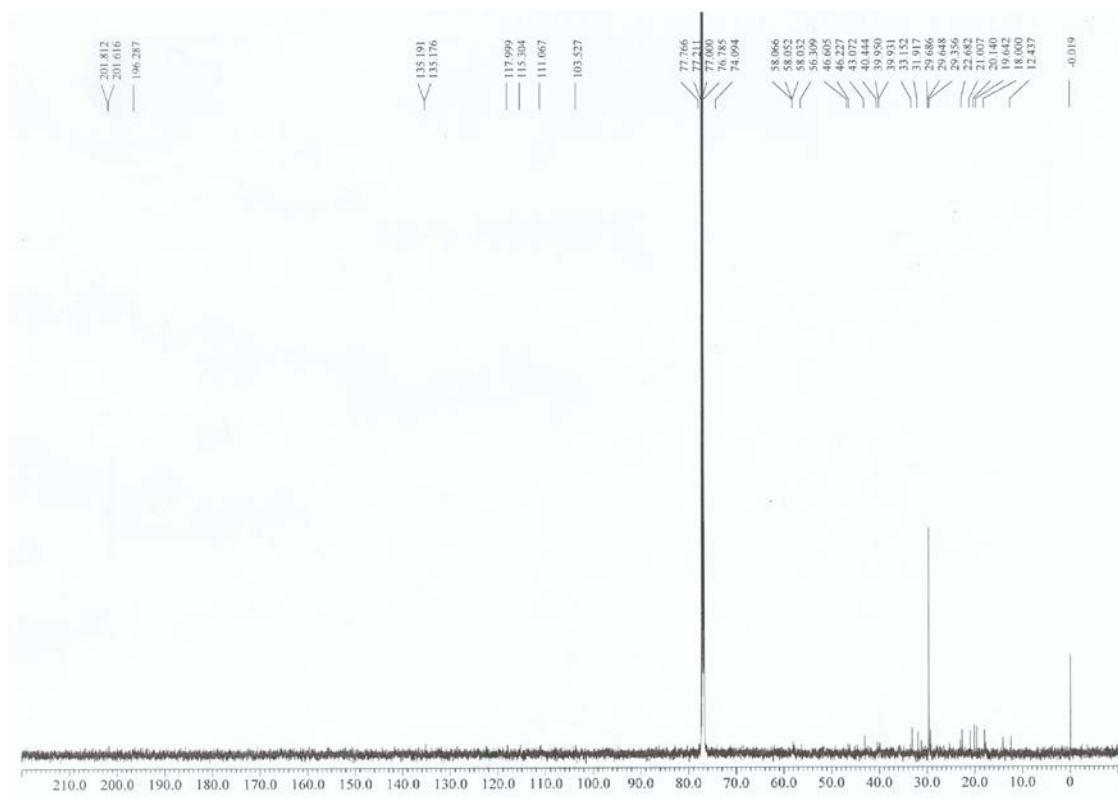

**Figure S19.** <sup>13</sup>C NMR spectrum of **3**.

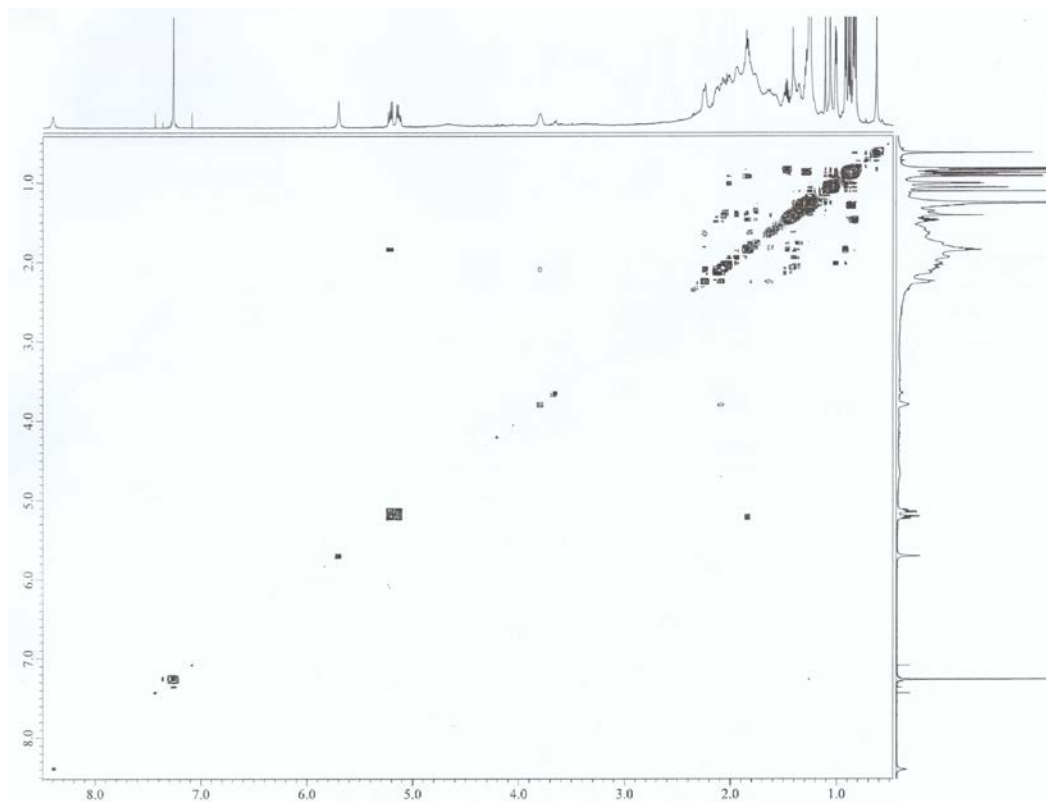

**Figure S20.** <sup>1</sup>H-<sup>1</sup>H COSY spectrum of **3**.

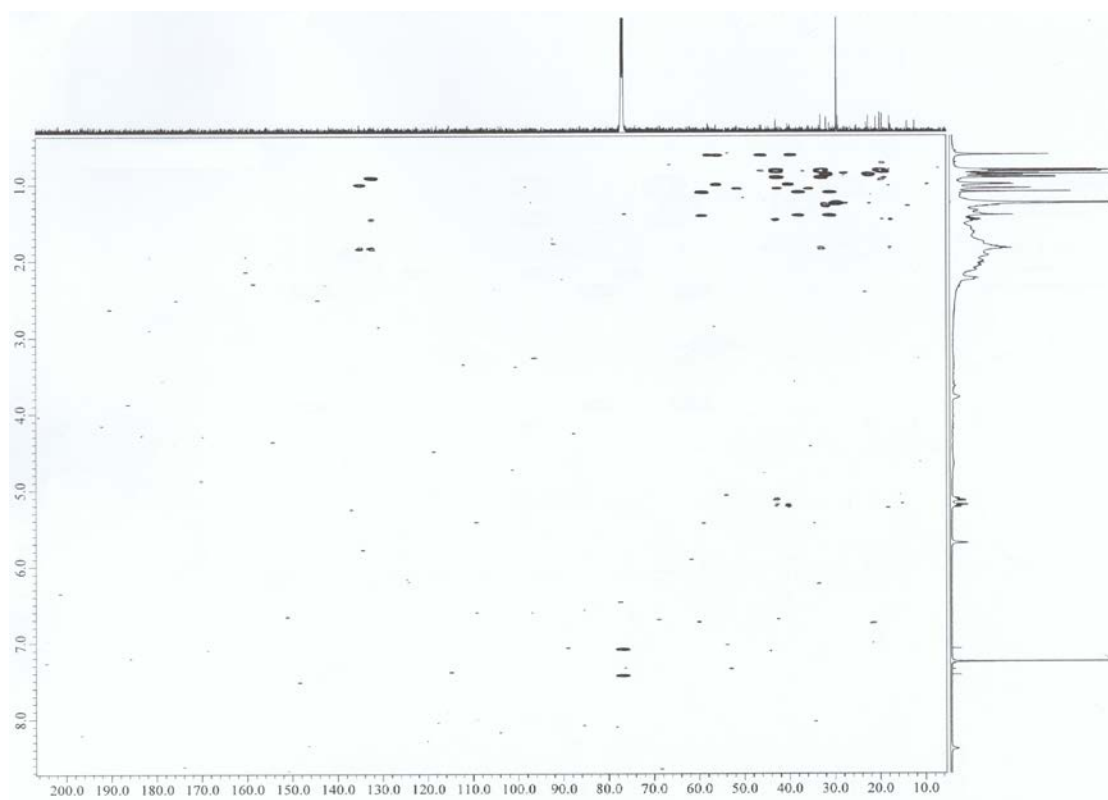

**Figure S21.** HMBC spectrum of **3**.

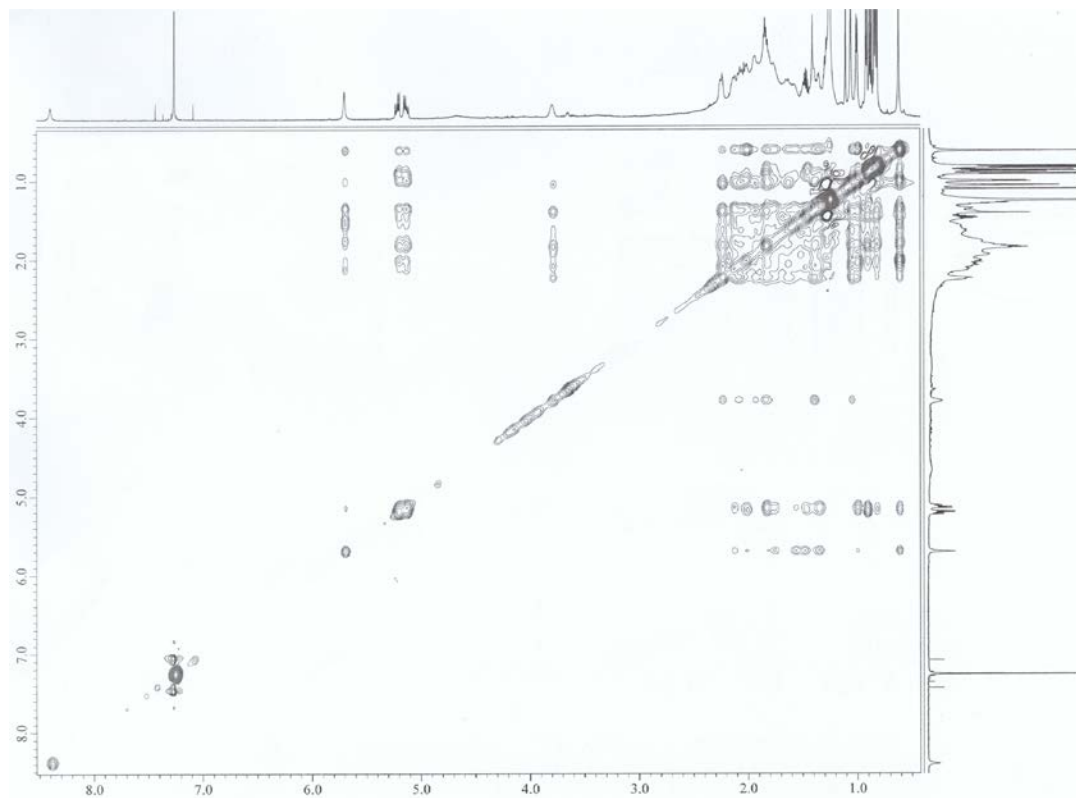

**Figure S22.** NOESY spectrum of **3**.

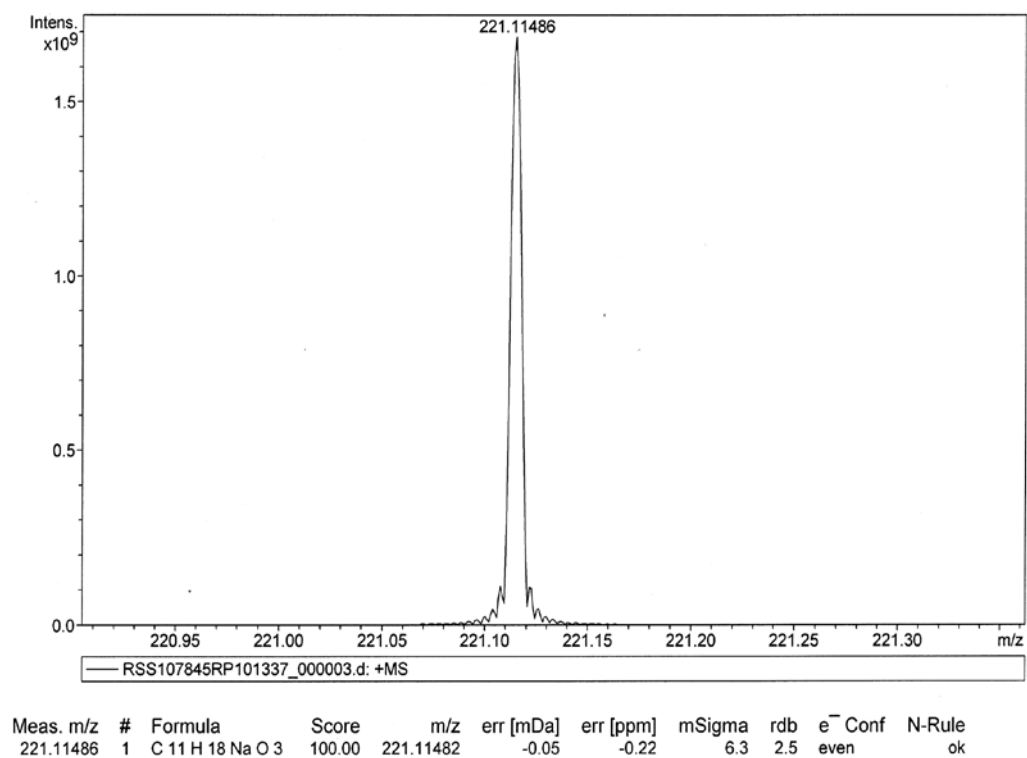

**Figure S23.** HRESIMS spectrum of **4**.

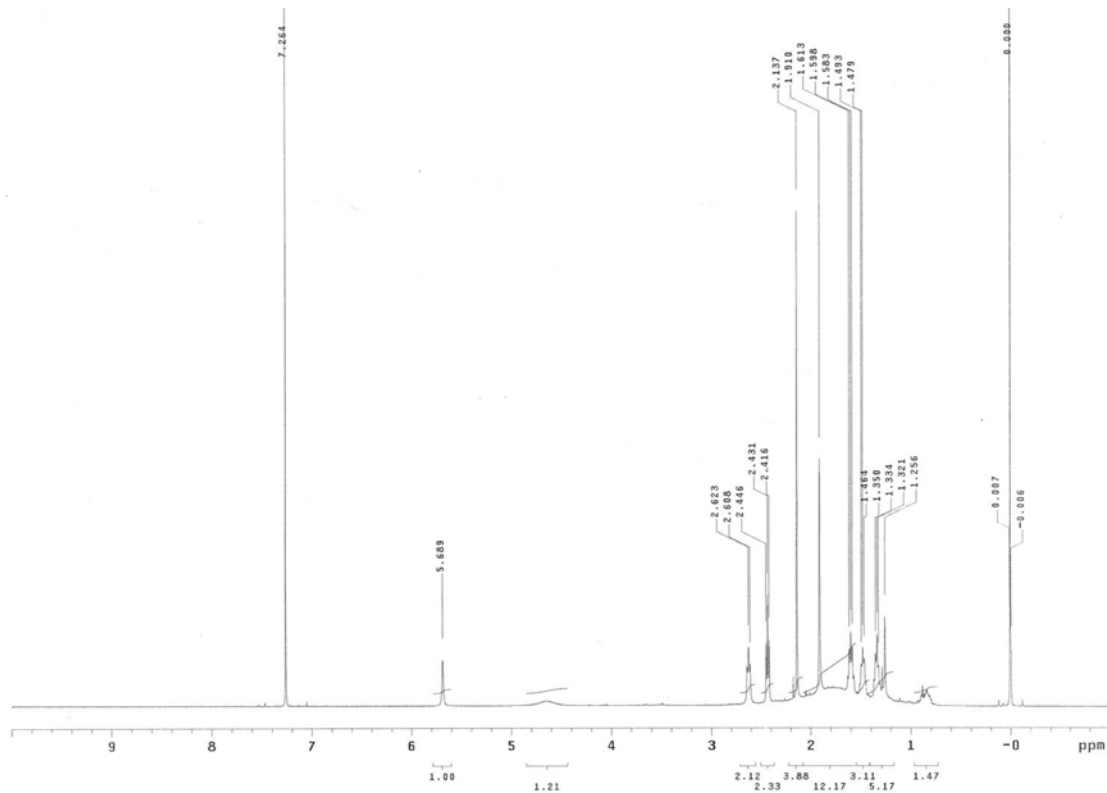

**Figure S24.** <sup>1</sup>H NMR spectrum of **4**.

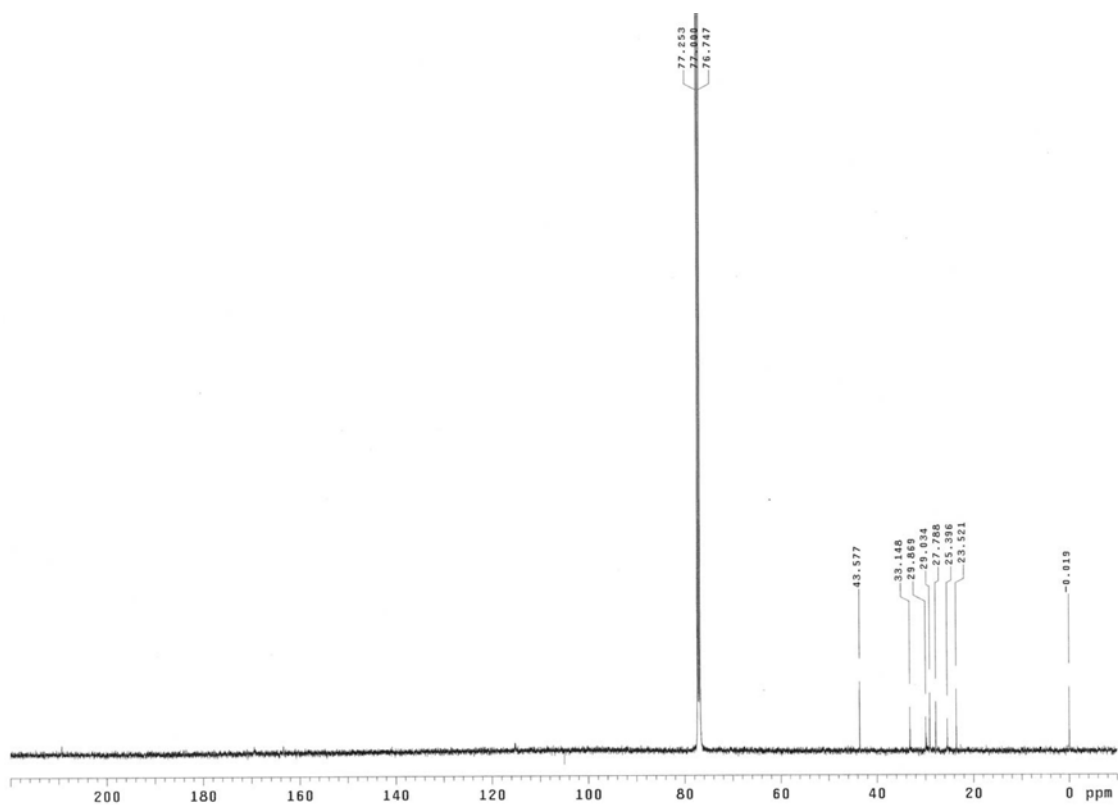

**Figure S25.** <sup>13</sup>C NMR spectrum of **4**.

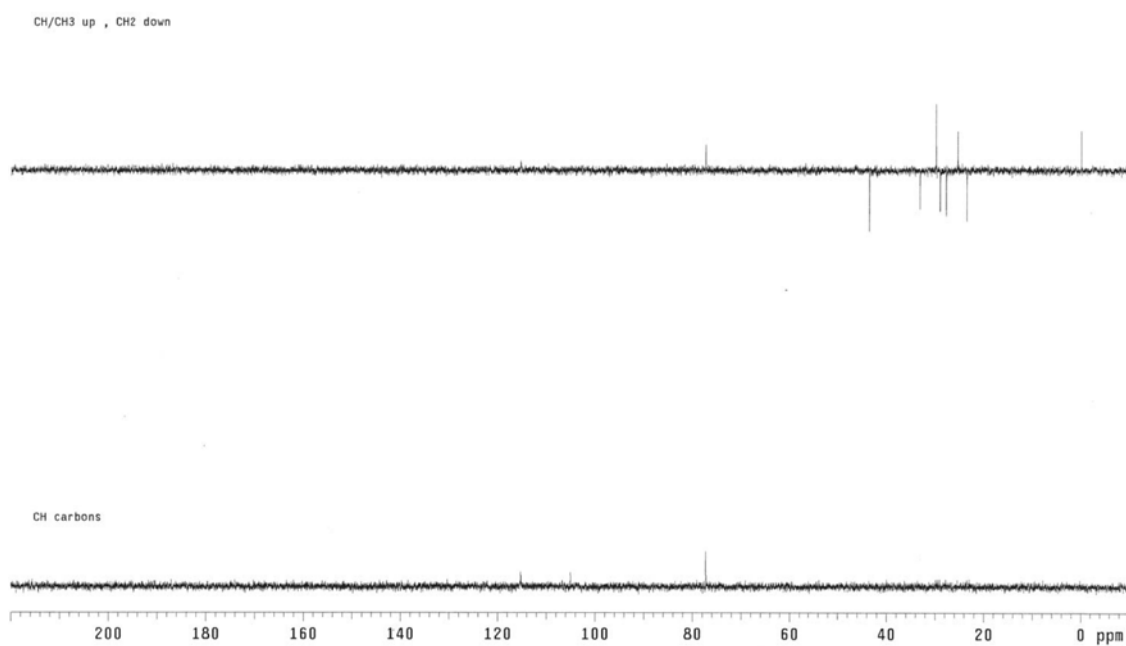

**Figure S26.** DEPT spectrum of **4**.

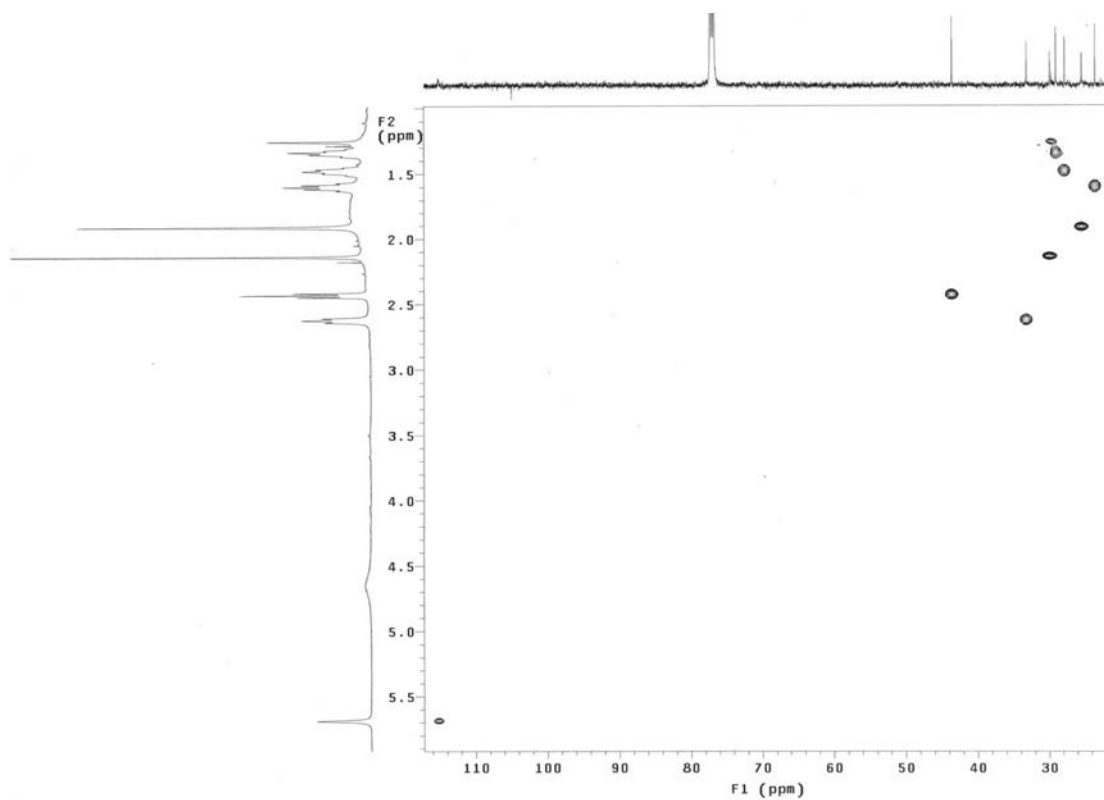

**Figure S27.** HSQC spectrum of **4**.

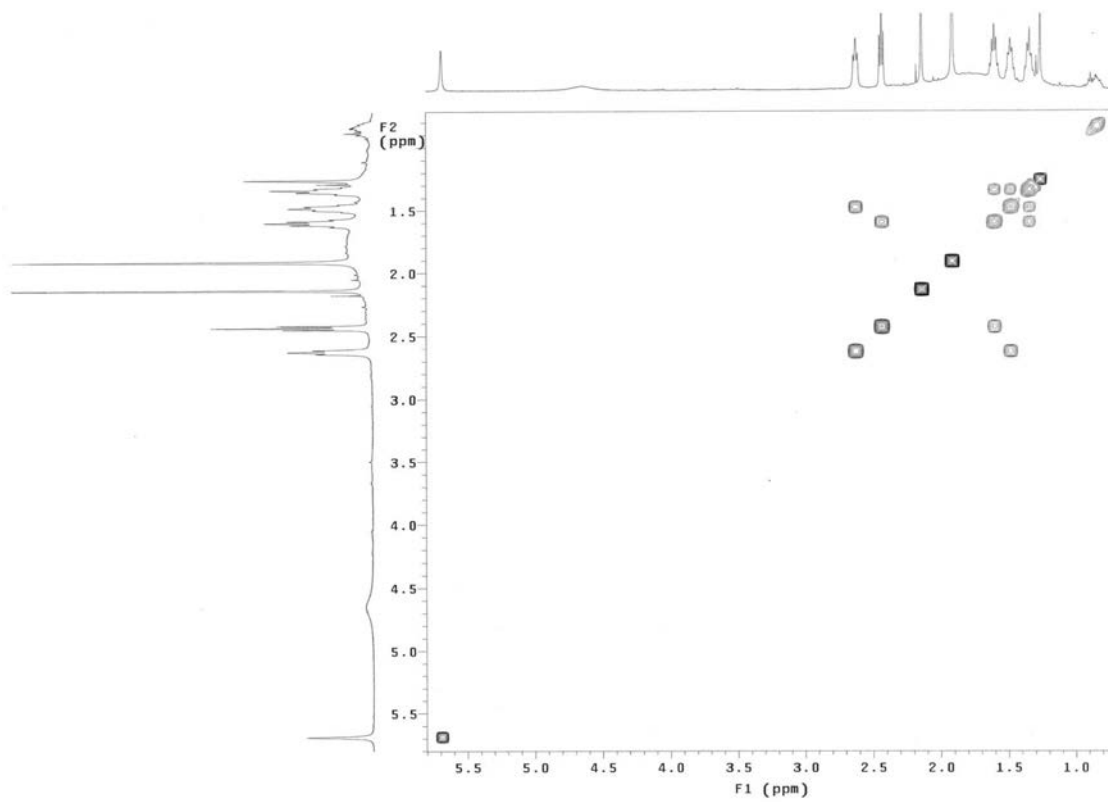

**Figure S28.**  $^1\text{H}$ - $^1\text{H}$  COSY spectrum of **4**.



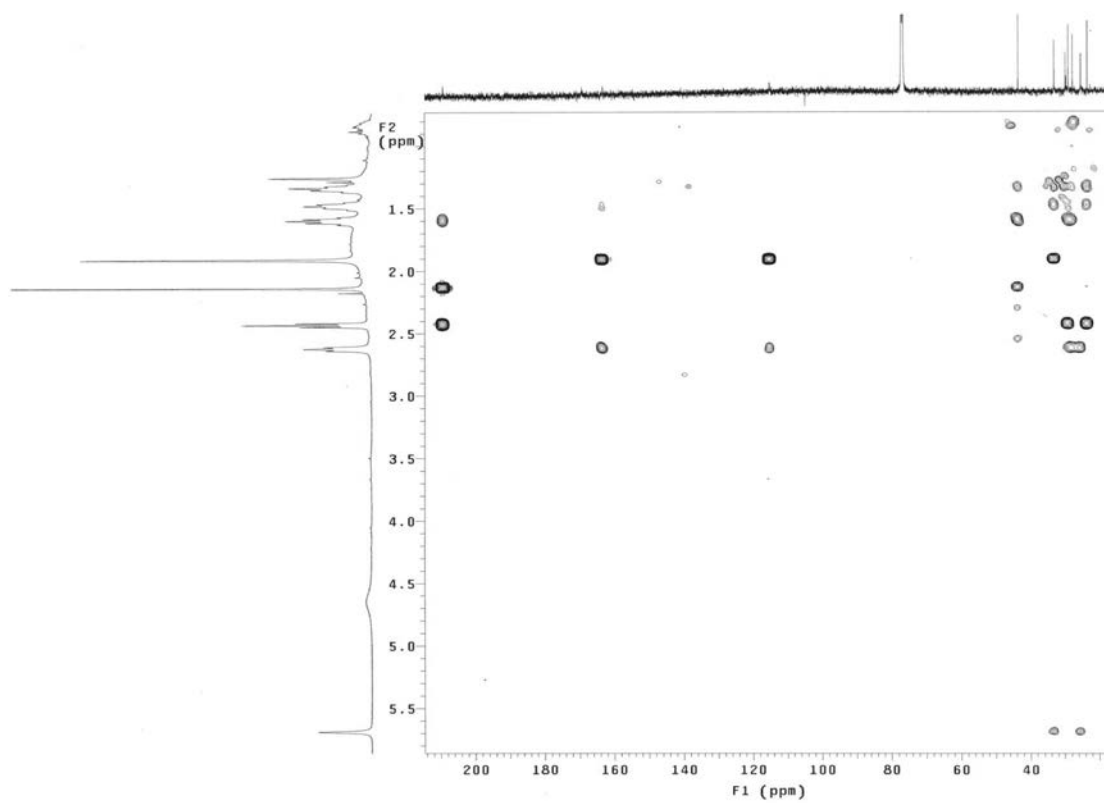

**Figure S29.** HMBC spectrum of **4**.

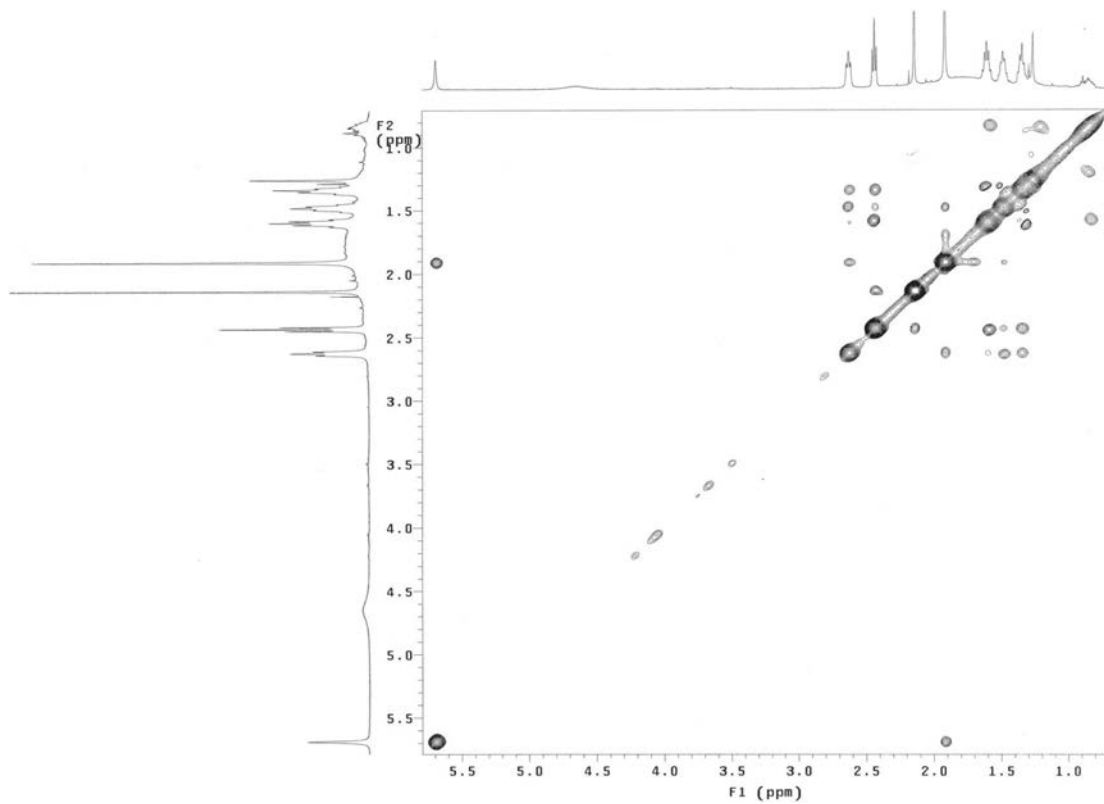

**Figure S30.** NOESY spectrum of **4**.

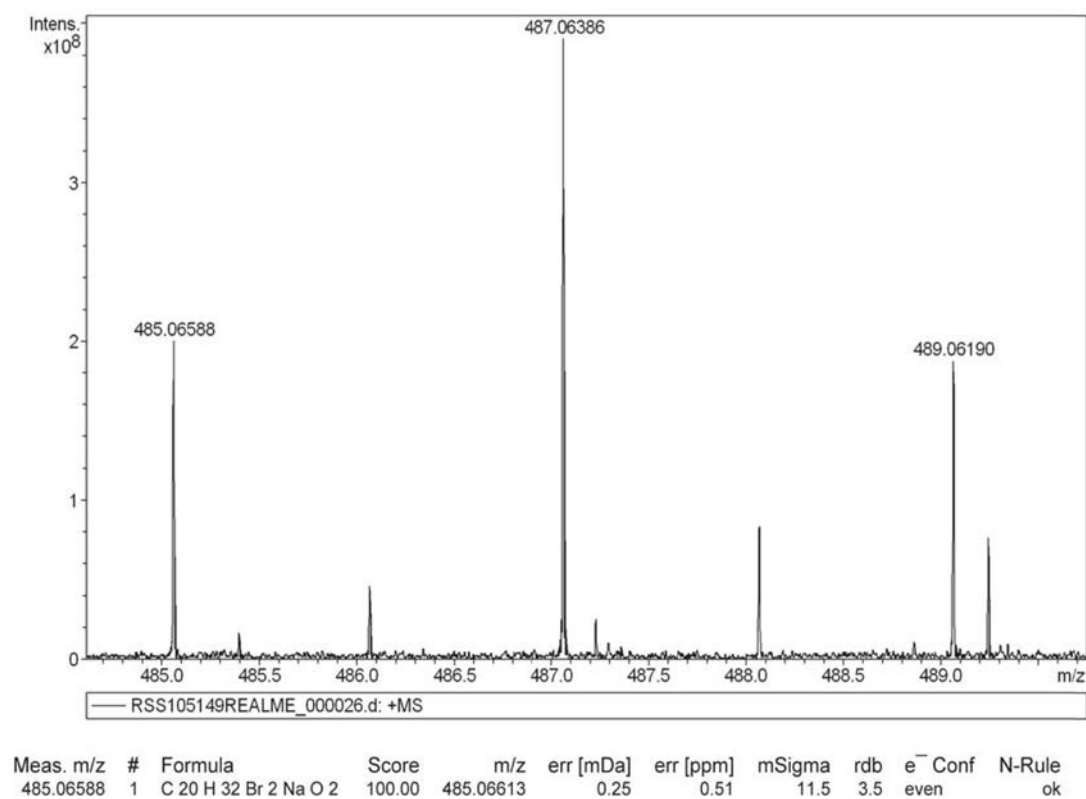

**Figure S31.** HRESIMS spectrum of **5**.

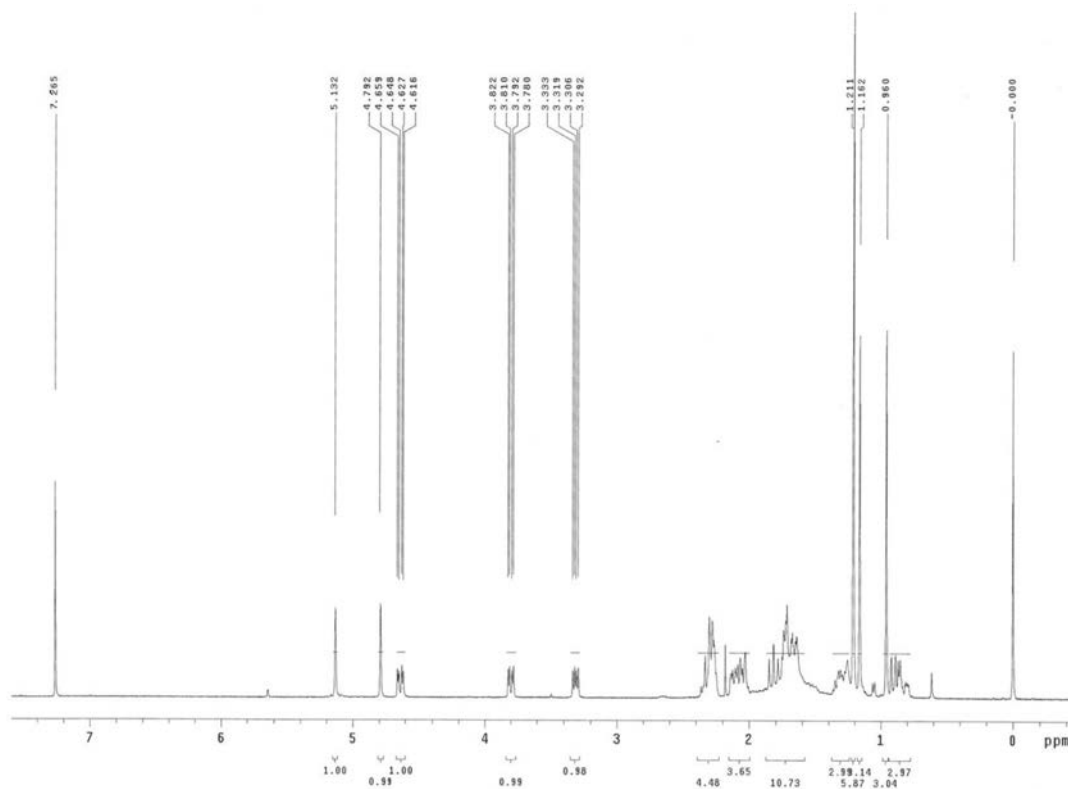

**Figure S32.** <sup>1</sup>H NMR spectrum of **5**.

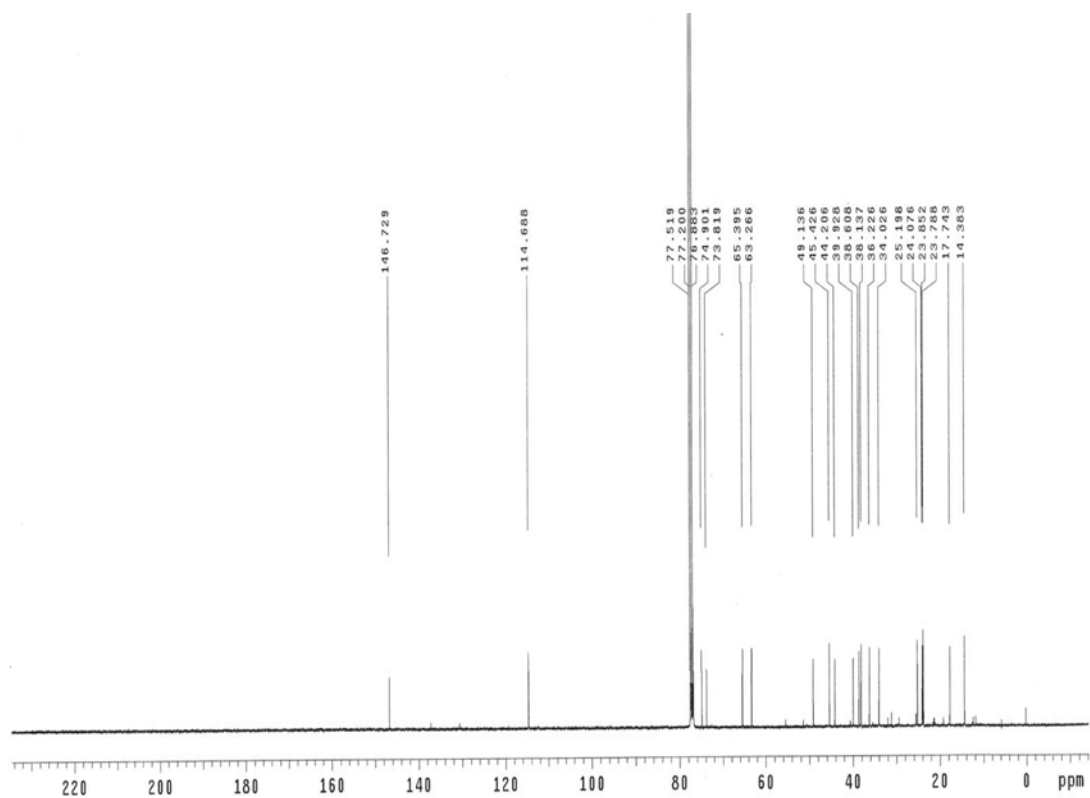

**Figure S33.**  $^{13}\text{C}$  NMR spectrum of **5**.

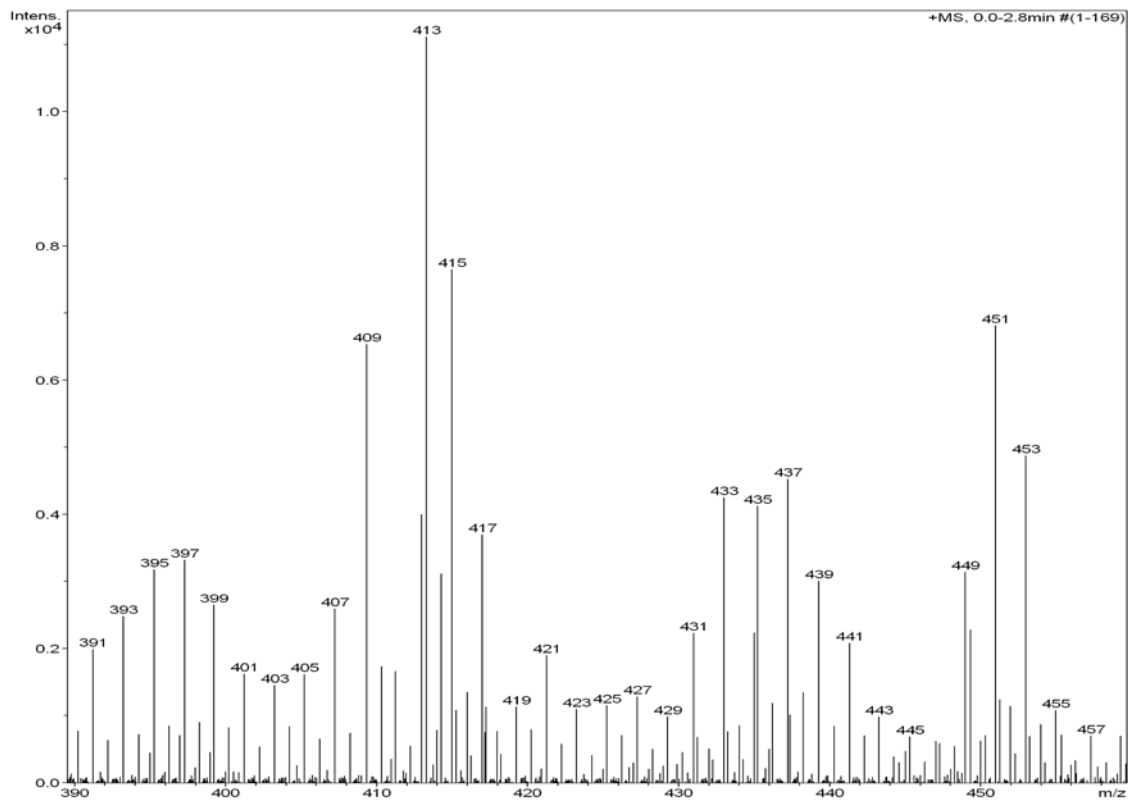

**Figure S34.** ESIMS spectrum of **6**.

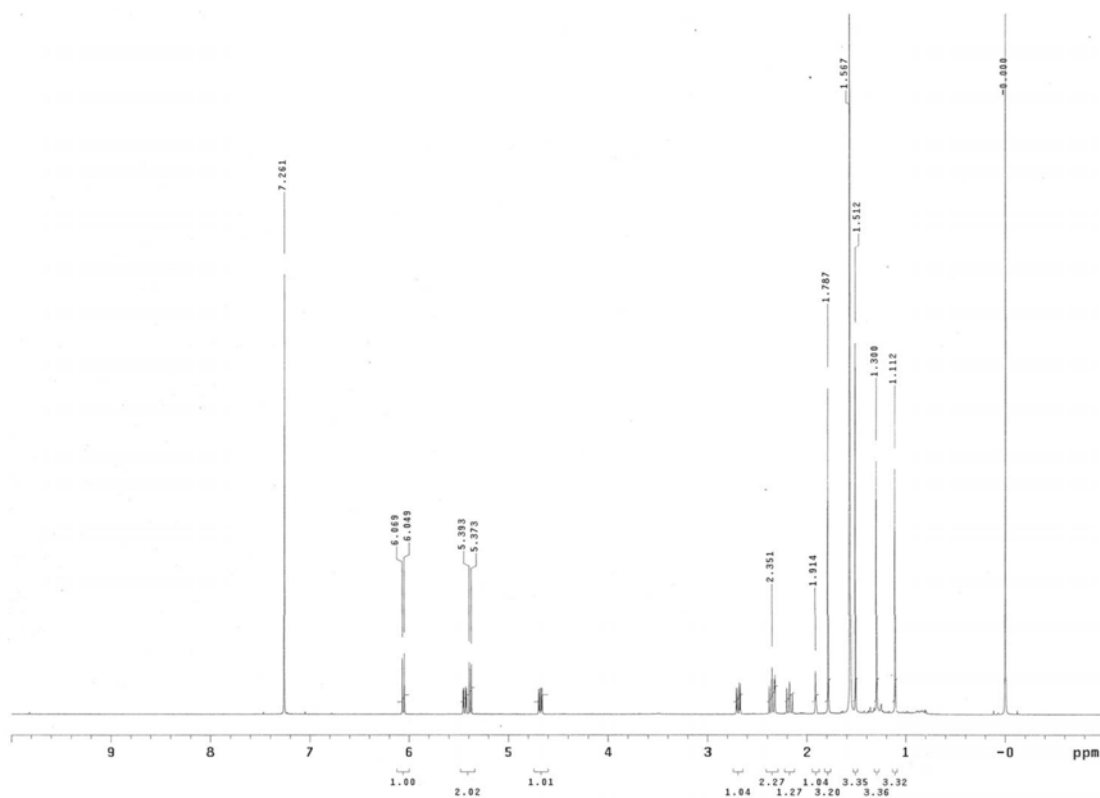

Figure S35. <sup>1</sup>H NMR spectrum of **6**.

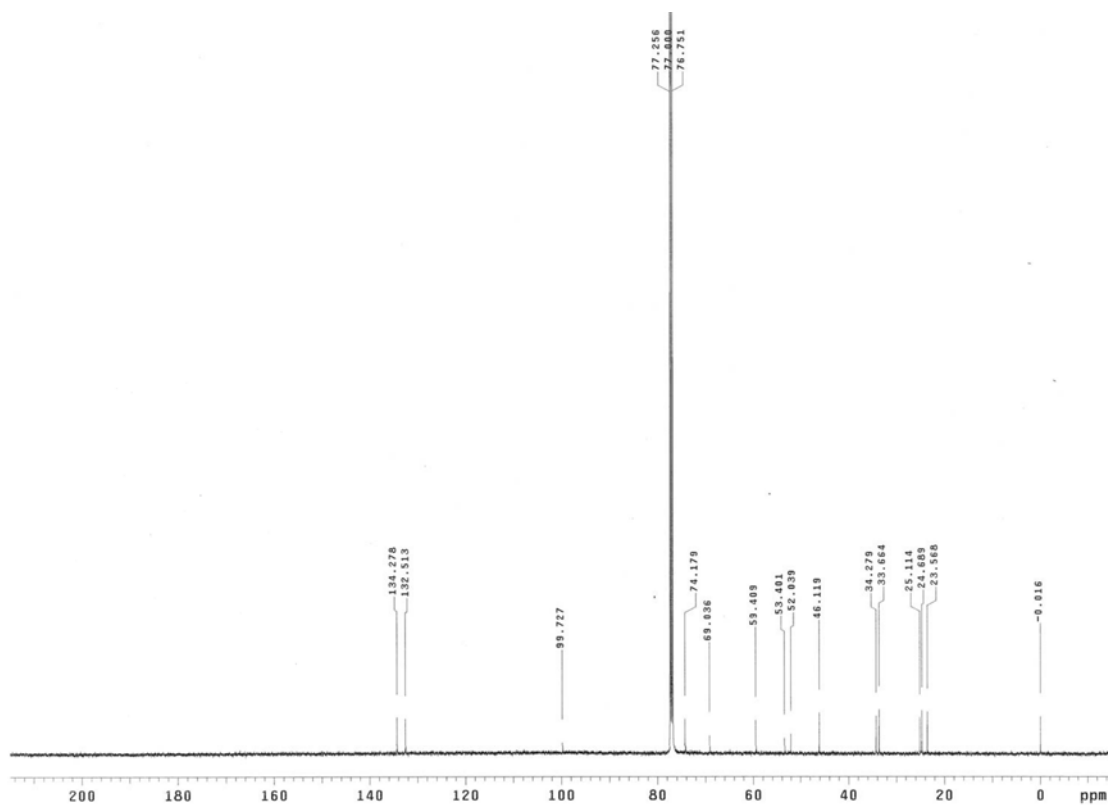

Figure S36. <sup>13</sup>C NMR spectrum of **6**.

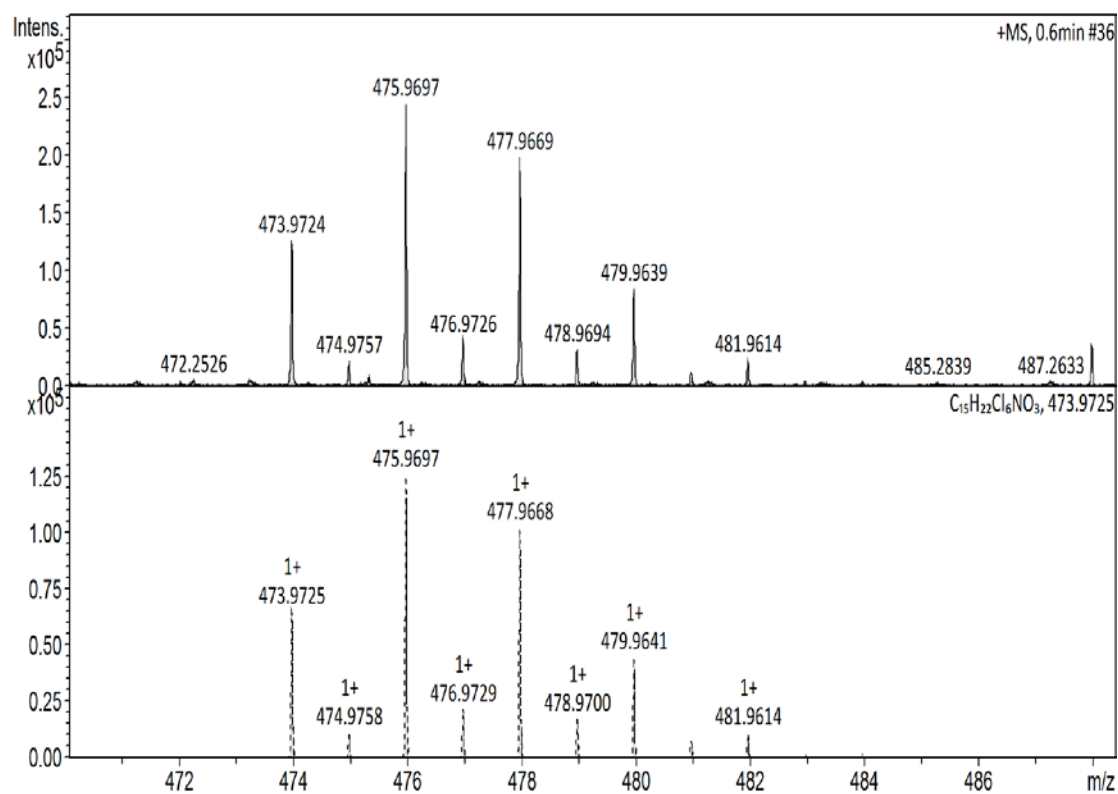

**Figure S37.** HRESIMS spectrum of 7.

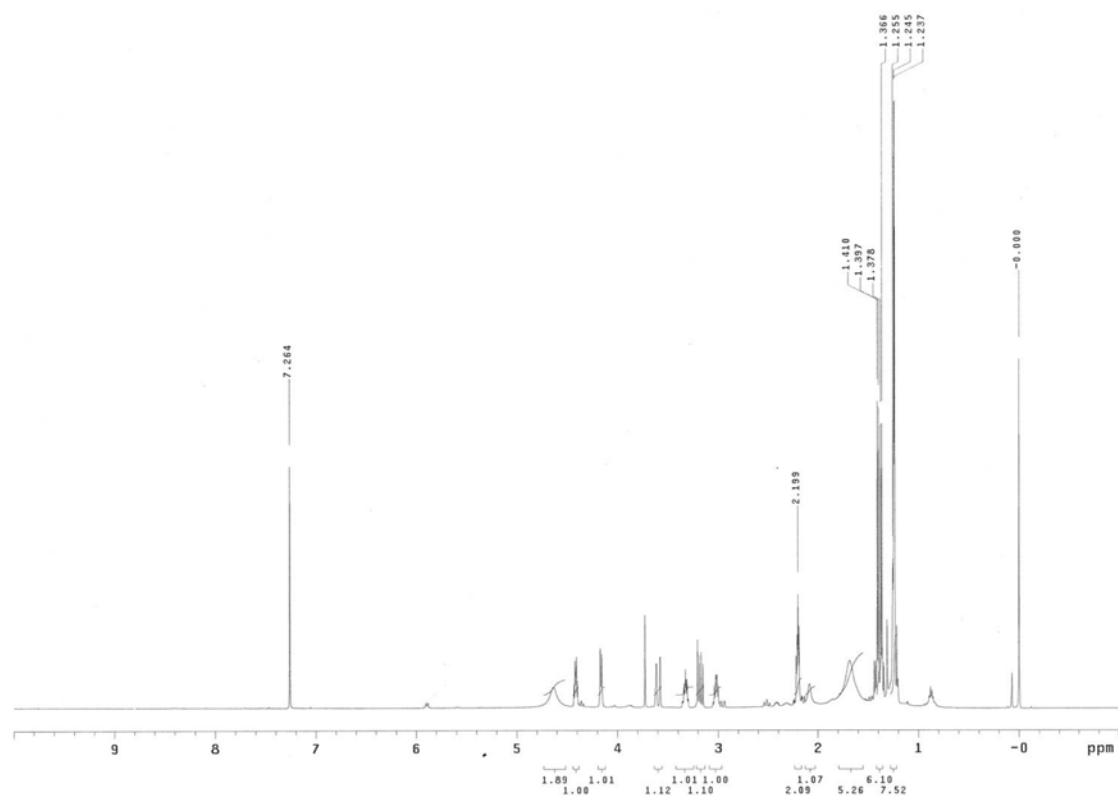

**Figure S38.** <sup>1</sup>H NMR spectrum of 7.

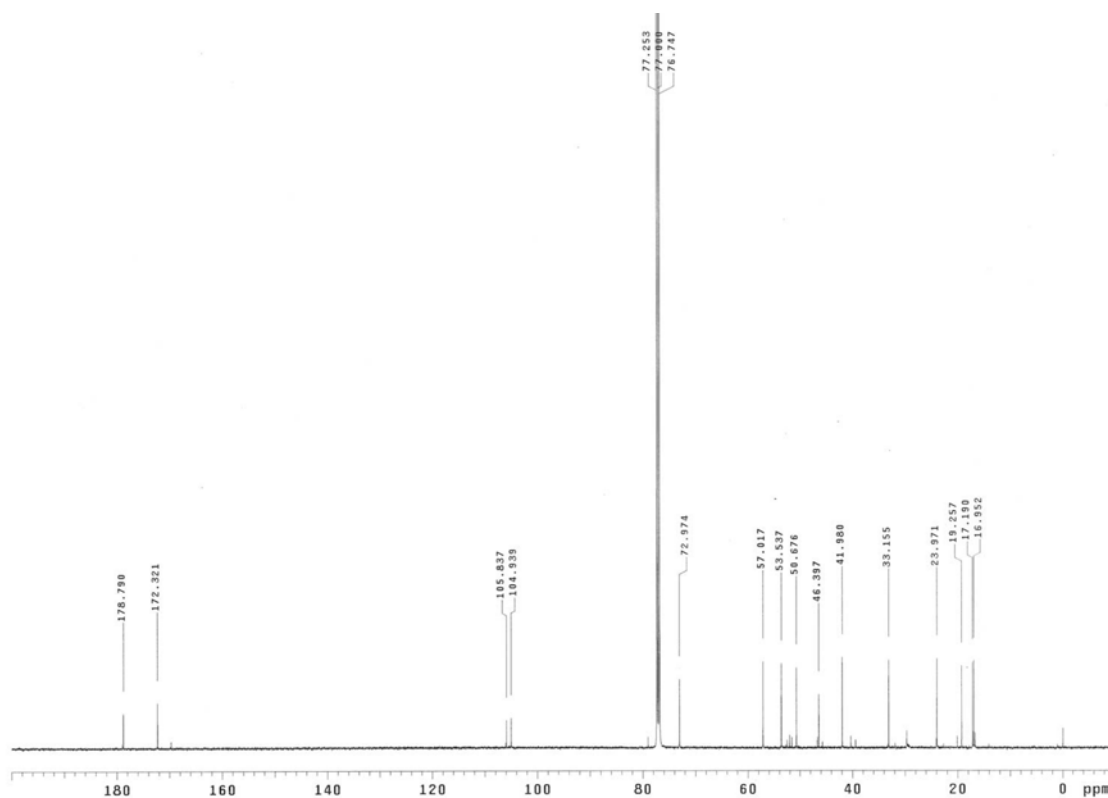

**Figure S39.**  $^{13}\text{C}$  NMR spectrum of **7**.

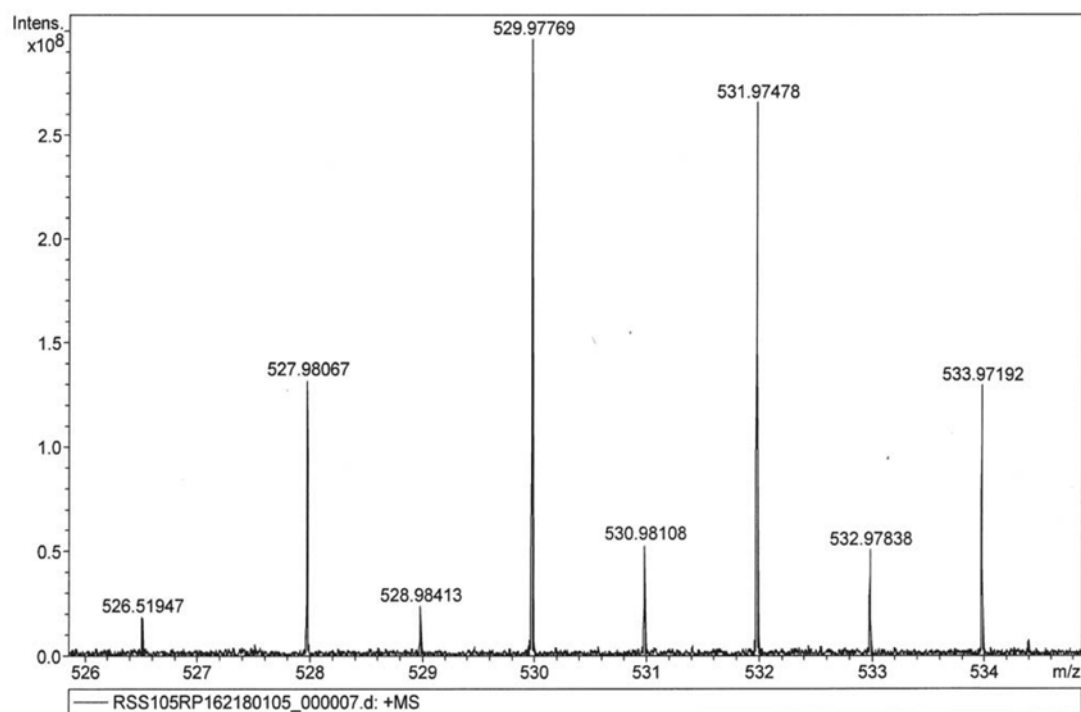

| Meas. m/z | # | Formula                                                                         | Score  | m/z       | err [mDa] | err [ppm] | mSigma | rdb | e <sup>-</sup> | Conf | N-Rule |
|-----------|---|---------------------------------------------------------------------------------|--------|-----------|-----------|-----------|--------|-----|----------------|------|--------|
| 527.98067 | 1 | C <sub>16</sub> H <sub>25</sub> Cl <sub>6</sub> N <sub>4</sub> NaO <sub>4</sub> | 100.00 | 527.98070 | 0.02      | 0.05      | 43.8   | 1.5 | even           |      | ok     |

**Figure S40.** HRESIMS spectrum of **8**.

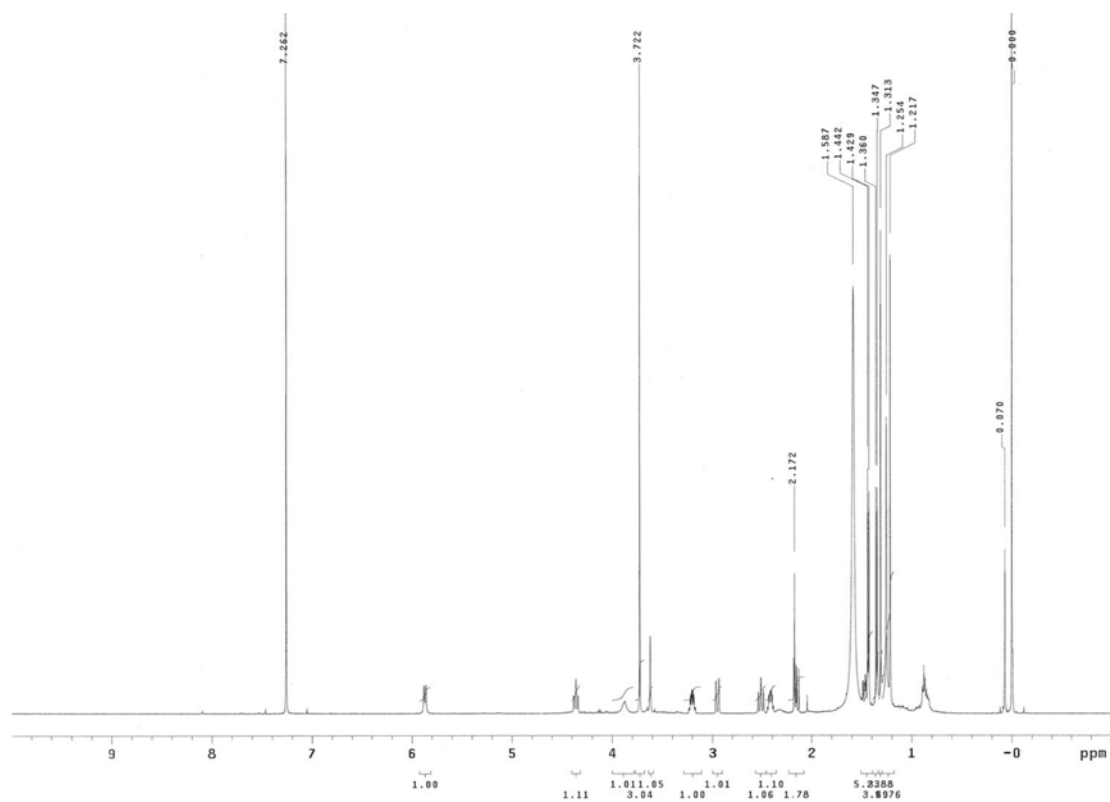

Figure S41. <sup>1</sup>H NMR spectrum of 8.

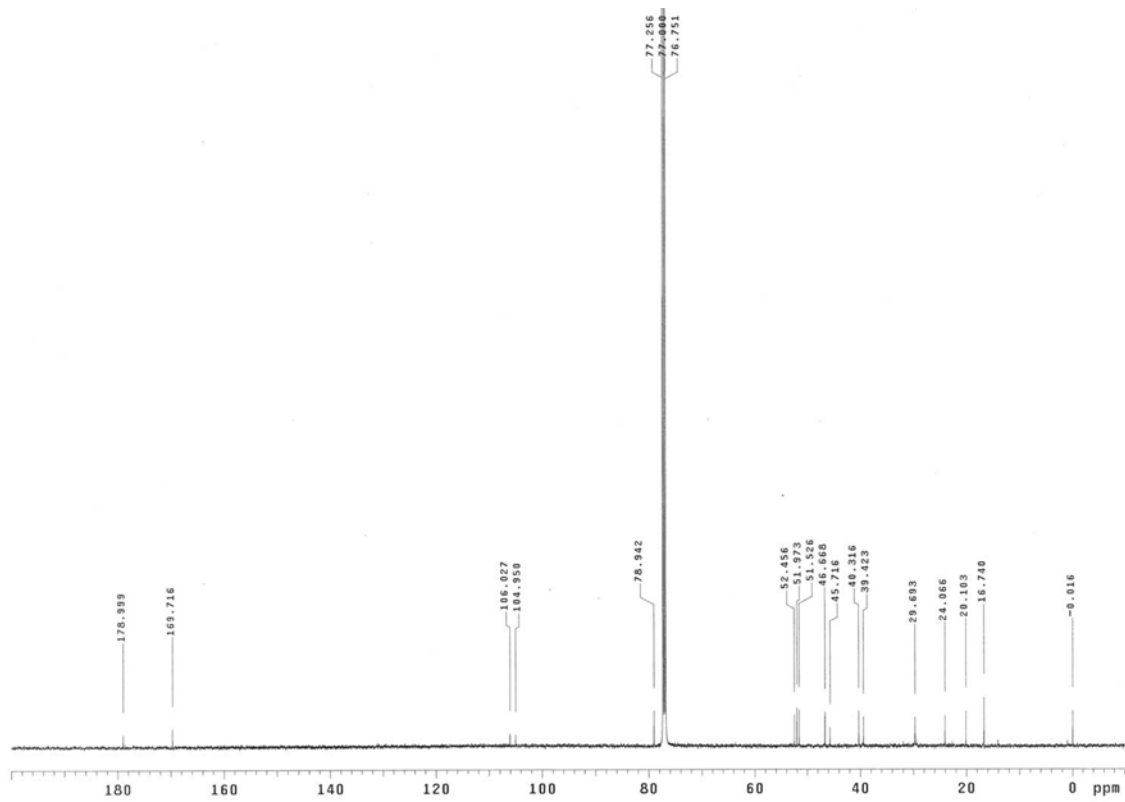

Figure S42. <sup>13</sup>C NMR spectrum of 8.

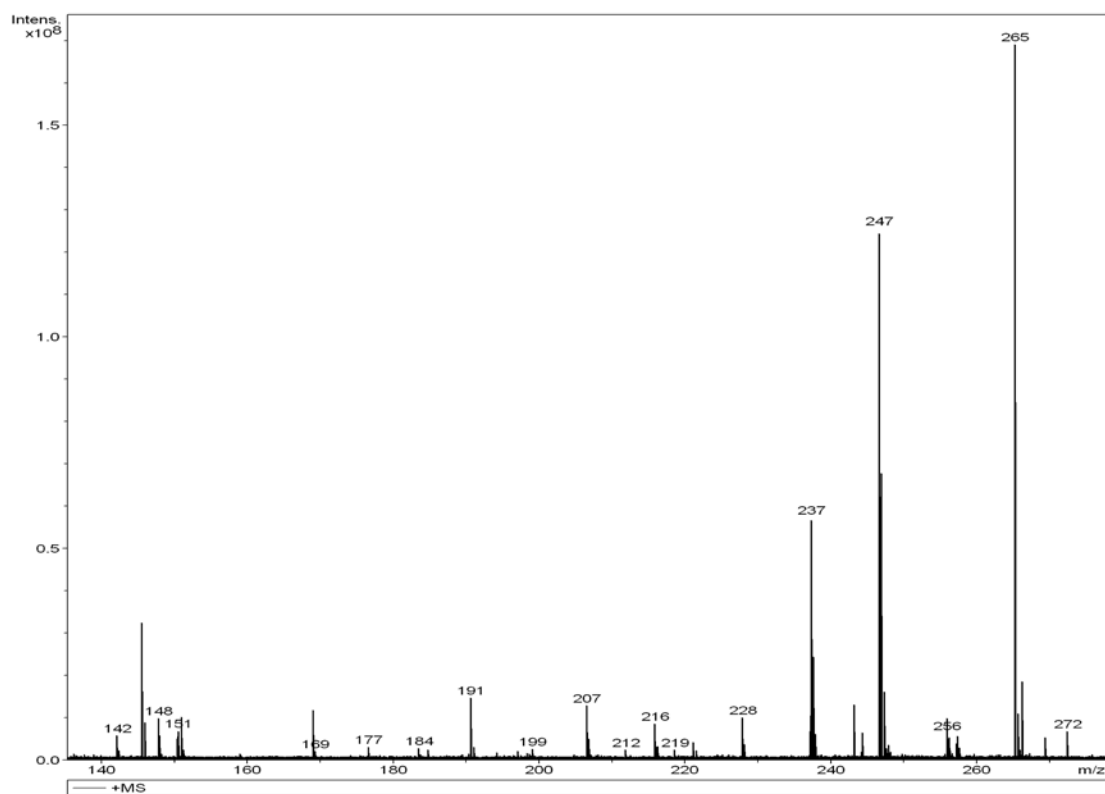

**Figure S43.** ESIMS spectrum of **9**.

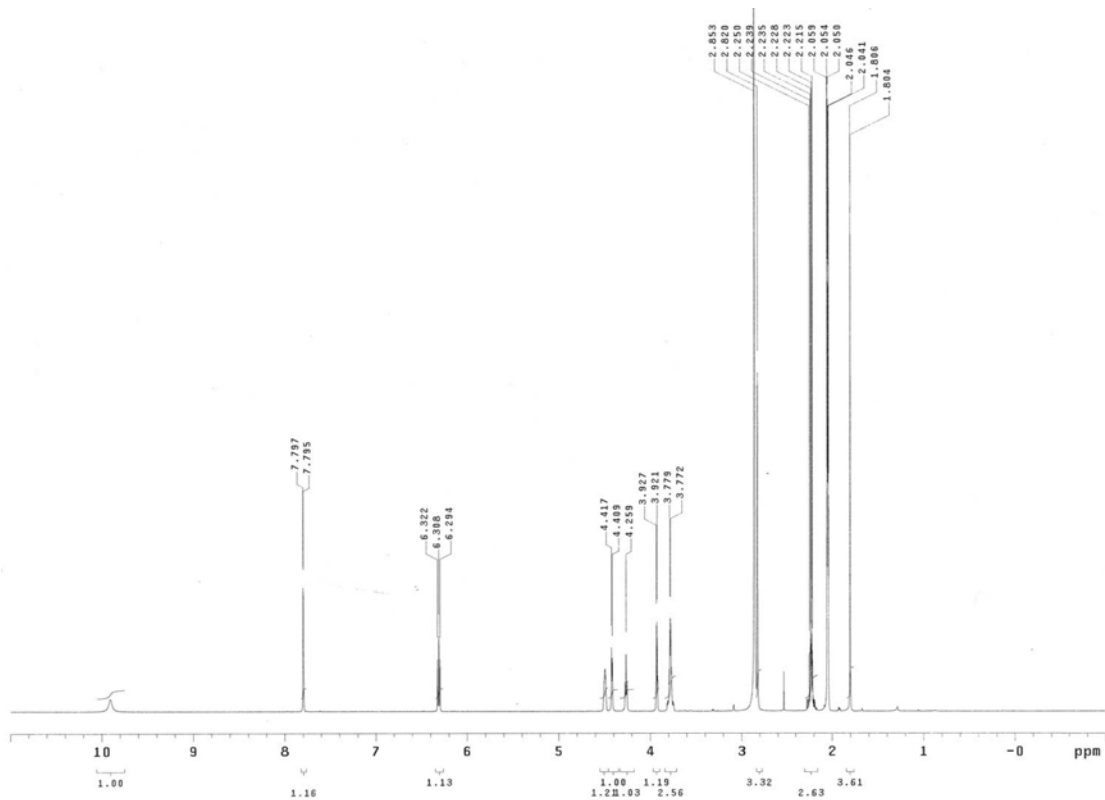

**Figure S44.** <sup>1</sup>H NMR spectrum of **9**.



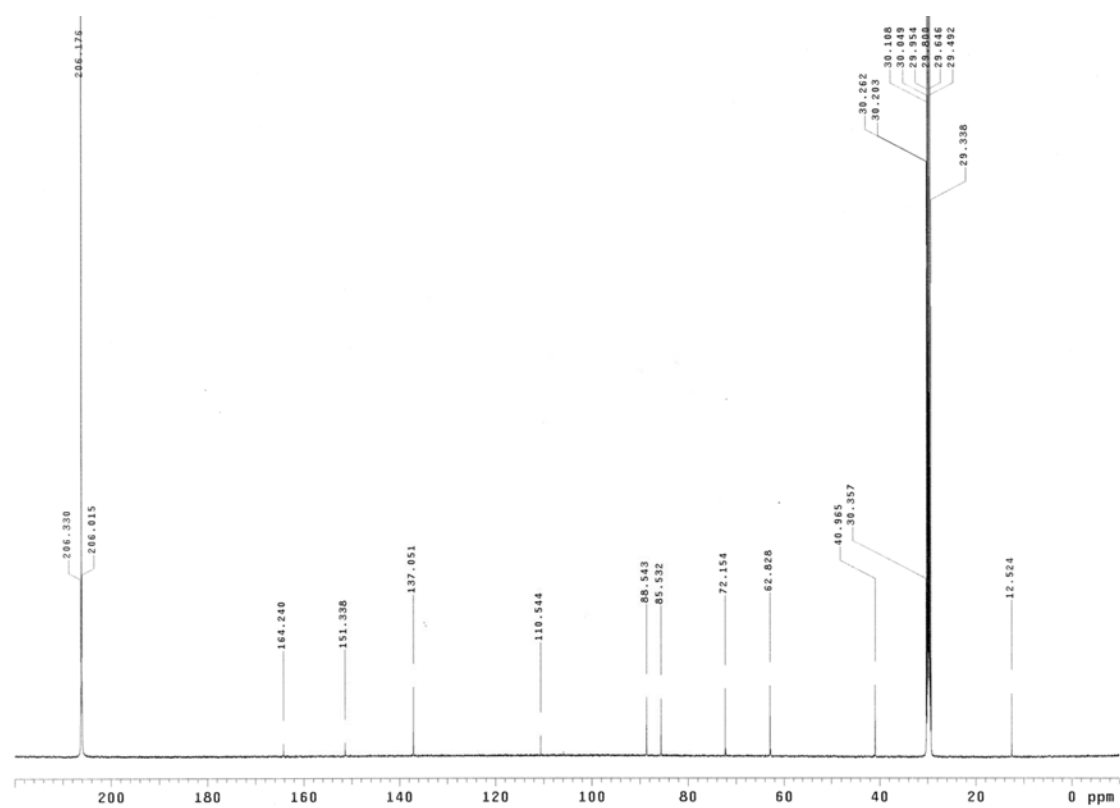

**Figure S45.** <sup>13</sup>C NMR spectrum of **9**.
